24 <sup>7</sup>Landscape Biodiversity Lab, Ecology Department, Montana State University, Bozeman, MT,  
25 59717, USA

26 <sup>8</sup>Rainforest Foundation Norway, Mariboegate 8, 0183 Oslo

27 <sup>9</sup>Global Wildlife Conservation, P.O. Box 129, Austin, Texas 78767, USA

28 <sup>10</sup>School of Life Sciences, Arizona State University, P.O. Box 874501, Tempe, Arizona 85287,  
29 USA

30 <sup>11</sup>Centre for Tropical Environmental and Sustainability Science, College of Science and  
31 Engineering, James Cook University, Cairns, QLD 4878, Australia

32 <sup>12</sup>Environmental Change Institute, School of Geography and the Environment, University of  
33 Oxford, Oxford, United Kingdom

34 <sup>13</sup>School of Earth and Environmental Sciences, University of Queensland, Brisbane, Australia

35 <sup>14</sup>The Nature Conservancy, Arlington, VA, USA

36 <sup>15</sup>World Wide Fund for Nature Germany, Space+Science

37 <sup>16</sup>Natural Resource and Environmental Studies Institute, University of Northern British Columbia,  
38 Prince George, Canada

39 <sup>17</sup>International Institute of Sustainability, Rio de Janeiro, 22460-320, Brazil

40 <sup>18</sup>International Institute for Applied Systems Analysis, Laxenburg, Austria

41

42 \*<sup>†</sup>[hgrantham@wcs.org](mailto:hgrantham@wcs.org)

43

44 **Abstract:** Many global environmental agendas, including halting biodiversity loss, reversing land  
45 degradation, and limiting climate change, depend upon retaining forests with high ecological  
46 integrity, yet the scale and degree of forest modification remains poorly quantified and mapped.  
47 By integrating data on observed and inferred human pressures and an index of lost connectivity,  
48 we generate the first globally-consistent, continuous index of forest condition as determined by

49 degree of anthropogenic modification. Globally, only 17.4 million km<sup>2</sup> of forest (40.5%) have  
50 high landscape level integrity (mostly found in Canada, Russia, the Amazon, Central Africa and  
51 New Guinea) and only 27% of this area is found in nationally-designated protected areas. Of the  
52 forest in protected areas, only 56% has high landscape level integrity. Ambitious policies that  
53 prioritize the retention of forest integrity, especially in the most intact areas, are now urgently  
54 needed alongside current efforts aimed at halting deforestation and restoring the integrity of  
55 forests globally.

56

## 57 **MAIN TEXT**

58

### 59 **Introduction**

50

51 Deforestation is a major environmental issue <sup>1</sup>, but far less attention has been given to the degree  
52 of anthropogenic modification of remaining forests, which reduces ecosystem integrity and  
53 diminishes many of the benefits that these forests provide <sup>2,3</sup>. This is worrying since modification  
54 is potentially as significant as outright forest loss in determining overall environmental outcomes  
55 <sup>4</sup>. There is increasing recognition of this issue, for forests and other ecosystems, in synthesis  
56 reports by global science bodies e.g. <sup>5</sup>, and it is now essential that the scientific community  
57 develop improved tools and data to facilitate the consideration of levels of integrity in decision-  
58 making. Mapping and monitoring this globally will provide essential information for coordinated  
59 global, national and local policy-making, planning and action, to help nations and other  
70 stakeholders achieve the Sustainable Development Goals (SDGs) and implement other shared  
71 commitments such as the United Nations Convention on Biological Diversity (CBD), Convention  
72 to Combat Desertification (UNCCD), and Framework Convention on Climate Change  
73 (UNFCCC).

74

75 Ecosystem integrity is foundational to all three of the Rio Conventions (UNFCCC, UNCCD,  
76 CBD ). As defined by Parrish *et al.* <sup>6</sup>, it is essentially the degree to which a system is free from  
77 anthropogenic modification of its structure, composition and function. Such modification causes  
78 the reduction of many ecosystem benefits, and is often also a precursor to outright deforestation  
79 <sup>7,8</sup>. Forests largely free of significant modification (i.e. forests having high ecosystem integrity),  
80 typically provide higher levels of many forest benefits than modified forests of the same type <sup>9</sup>,  
81 including; carbon sequestration and storage <sup>10</sup>, healthy watersheds <sup>11</sup>, traditional homelands for  
82 imperiled cultures <sup>12</sup>, contribution to local and regional climate processes <sup>13</sup>, and forest-dependent  
83 biodiversity <sup>14-17</sup>. Industrial-scale logging, fragmentation by infrastructure, farming (including  
84 cropping and ranching) and urbanization, as well as less visible forms of modification such as  
85 over-hunting, wood fuel extraction and changed fire or hydrological regimes <sup>18,19</sup>, all degrade the  
86 degree to which forests still support these benefits, as well as their long-term resilience to climate  
87 change <sup>9</sup>. There can be trade-offs however, between the benefits best provided by less-modified  
88 forests (e.g., regulatory functions such as carbon sequestration) and those production services that  
89 require some modification (e.g., timber production). These trade-offs can, at times, result in  
90 disagreement among stakeholders as to which forest benefits should be prioritized <sup>20</sup>.

91

92 In recent years, easily accessible satellite imagery and new analytical approaches have  
93 dramatically improved our ability to map and monitor forest extent globally <sup>21-23</sup>. However, while  
94 progress has been made in developing tools for assessment of global forest losses and gains,  
95 consistent monitoring of the degree of forest modification has proved elusive <sup>24,25</sup>.

96 Technical challenges include the detection of low intensity and unevenly distributed forest  
97 modification, the wide diversity of changes that comprise forest modification, and the fact that  
98 many changes are concealed by the forest canopy <sup>24</sup>. New approaches are emerging on relevant

99 forest indicators, such as canopy height, canopy cover and fragmentation, and maps of different  
100 human pressures, which are used as proxies for impacts on forests e.g., <sup>26,27,28</sup>. Some binary  
101 measures of forest modification, such as Intact Forest Landscapes <sup>29</sup> and wilderness areas <sup>30</sup>, have  
102 also been mapped at the global scale and used to inform policy, but do not resolve the degree of  
103 modification within remaining forests, which we aimed to do with this assessment.

104  
105 Human activities influence the integrity of forests at multiple spatial scales, including intense,  
106 localized modifications such as road-building and canopy loss, more diffuse forms of change that  
107 are often spatially associated with these localized pressures (e.g. increased accessibility for  
108 hunting, other exploitation, and selective logging), and changes in spatial configuration that alter  
109 landscape-level connectivity. Previous studies have quantified several of these aspects  
110 individually e.g. <sup>26,27,28</sup>, but there is a need to integrate them to measure and map the overall  
111 degree of modification considering these landscape-level anthropogenic influences at each site.  
112 Here, we integrate data on forest extent defined as all woody vegetation taller than 5 m, following  
113 <sup>22</sup>, ‘observed’ human pressures (e.g. infrastructure) which can be directly mapped using current  
114 datasets, other ‘inferred’ human pressures (e.g. collection of forest materials) that occur in  
115 association with those that are observed but cannot be mapped directly, and alterations in forest  
116 connectivity, to create the “Forest Landscape Integrity Index” (FLII), that describes the degree of  
117 forest modification for the beginning of 2019 (Fig. 1). The result is the first globally applicable,  
118 continuous-measure map of landscape level forest integrity (hereafter, integrity), which offers a  
119 timely indicator of the status and management needs of Earth’s remaining forests, as well as a  
120 flexible methodological framework (Fig. 1) for measuring changes in forest integrity that can be  
121 adapted for more detailed analysis at national or subnational scales.

122

## 123 **Results**

24

25 Forest modification caused by human activity is both highly pervasive and highly variable across  
26 the globe (Fig. 2). We found 31.2% of forests worldwide are experiencing some form of  
27 ‘observed’ human pressure. Our models also inferred the likely occurrence of other pressures, and  
28 the impacts of lost connectivity, in almost every forest location (91.2% of forests), albeit  
29 sometimes at very low levels. Diverse, recognizable patterns of forest integrity can be observed in  
30 our maps at a range of scales, depending on the principal forms and general intensity of human  
31 activity in an area. Broad regional trends can be readily observed, for example the overall gradient  
32 of decreasing human impact moving northwards through eastern North America (Fig. 2), and  
33 finer patterns of impact are also clearly evident, down to the scale of individual protected areas,  
34 forest concessions, settlements and roads (Fig. S2).

35

36 FLII scores range from 0 (lowest integrity) to 10 (highest). We discretized this range to define  
37 three broad illustrative categories: low ( $\leq 6.0$ ); medium ( $> 6.0$  and  $< 9.6$ ); and high integrity ( $\geq 9.6$ )  
38 by benchmarking against reference locations worldwide (see Methods). Only 40.5% (17.4  
39 million km<sup>2</sup>) of forest was classified as having high integrity (Fig. 3; Table 1). Moreover, even in  
40 this category of high integrity (36%) still showed at least a small degree of human modification.  
41 The remaining 59% (25.6 million km<sup>2</sup>) of forest was classified as having low or medium integrity,  
42 including 25.6% (11 million km<sup>2</sup>) with low integrity (Fig. 3; Table 1). When we analyzed across  
43 biogeographical realms defined by <sup>31</sup> not a single biogeographical realm of the world had more  
44 than half of its forests in the high category (Fig. 3; Table 1).

45

46 The biogeographical realms with the largest area of forest with high integrity are the Palearctic,  
47 particularly northern Russia, and the Nearctic, in northern Canada, and Alaska. There are also large  
48 areas of forest with high integrity in the Neotropics, concentrated in the Amazon region, including

49 within the Guianas (Fig. 3, Table 1). The Afrotropic realm has significant areas with high  
50 integrity, particularly within the humid forests of central Africa (e.g., in Republic of Congo and  
51 Gabon) and in some of the surrounding drier forest/woodland belts (e.g., in South Sudan, Angola  
52 and Mozambique) (Fig. 3). In tropical Asia, the largest tracts of forest with high integrity are in  
53 New Guinea. Smaller but still very significant tracts of forest with high integrity are also scattered  
54 elsewhere in each of the main forested regions, including parts of Sumatra, Borneo, Myanmar and  
55 other parts of the greater Mekong subregion, Madagascar, West Africa, Mesoamerica, the  
56 Atlantic forests of Brazil, southern Chile, the Rocky Mountains, northern Assam, the Pacific  
57 forests of Colombia, the Caucasus, and the Russian Far East (Fig. 3).

58  
59 Concentrations of forest with low integrity are found in many regions including west and central  
60 Europe, the south-eastern USA, island and mainland South-East Asia west of New Guinea, the  
61 Andes, much of China and India, the Albertine Rift, West Africa, Mesoamerica and the Atlantic  
62 Forests of Brazil (Fig. 3). The overall extent of forests with low integrity is greatest in the  
63 Palearctic realm, followed by the Neotropics, which are also those biogeographic realms with the  
64 largest forest cover (Table 1). The Indo-Malayan realm has the highest percentage with low  
65 integrity, followed by the Afrotropics (Fig. 3; Table 1).

66  
67 These patterns result in variation with forest integrity scores in ways that allow objective  
68 comparisons to be made between locations and at a resolution relevant for policy and  
69 management planning, such as at national and sub-national scales. The global average FLII score  
70 for all countries is 5.48, representing generally low forest integrity, and a quarter of forested  
71 countries have a national average score < 4. National mean scores vary widely, ranging from >9  
72 in Guyana, French Guiana, Gabon, Sudan and South Sudan to <3 in Sierra Leone and many west

73 European countries (see Fig 4. and Table S5 for full list of countries). Provinces and other sub-  
74 national units vary even more widely (see Fig. S2 and Table S6)  
75  
76 Over one-quarter (26.1%) of all forests with high integrity fall within protected areas, compared  
77 to just 13.1% of low and 18.5% of medium integrity forests respectively. For all forests that are  
78 found within nationally designated protected areas (around 20% of all forests globally), we found  
79 the proportions of low, medium and high integrity forests were 16.8%, 30.3%, and 52.8%  
80 respectively (Table 2). Within the different protected area categories, we typically found that  
81 there was more area within the high integrity category versus the medium and low except for  
82 Category V (protected landscape/seascape) (Table 2). However, with 47.1% of forests within  
83 protected areas having low to medium integrity overall, it is clear that forests considered  
84 ‘protected’ are already often fairly modified (Table 2). Even though they are quite modified, some  
85 of these forests might still have high conservation importance, such as containing endangered  
86 species.

87

## 88 **Discussion**

89

90 By providing a transparent and defensible methodological framework, and by taking advantage of  
91 global data on forest extent, human drivers of forest modification, and changes in forest  
92 connectivity, our analysis paints a new, sobering picture of the extent of human impacts on the  
93 world’s forests. This analysis enables the changes that degrade many forest values (8) to be  
94 visualized in a new and compelling way and for policy makers and decision makers to see where  
95 forests that survive in good condition are found. By integrating data on multiple pressures that are  
96 known to modify forests, our analysis is the first to move global quantification beyond the use of  
97 simple categories, or solely using pressure indicators as proxies for integrity, to a more nuanced  
98 depiction of this issue as a continuum, recognising that not all existing forests are in the same



99 condition. Our analysis reveals that severe and extensive forest modification has occurred across  
100 all biogeographic regions of the world. Consequently, indices only using forest extent may  
101 inadequately capture the true impact of human activities on forests, and are insensitive to many  
102 drivers of forest modification and the resulting losses of forest benefits.

103  
104 A plan is clearly needed to put in place retention strategies for the remaining forests with high  
105 integrity, tailored towards the context in each country or jurisdiction and its different forest types  
106 <sup>32,33</sup>, because such areas are known to hold exceptional value. Avoiding the loss of integrity is a  
107 better strategy than aiming to restore forest condition after it is lost, because restoration is more  
108 costly, has a risk of failure, and is unlikely to lead to full recovery of benefits <sup>5</sup>. For the forests  
109 with highest integrity to be retained they should ideally be mapped using nationally appropriate  
110 criteria by the countries that hold them, formally recognized, prioritized in spatial plans, and  
111 placed under effective management (e.g. protected areas and other effective conservation areas,  
112 lands under Indigenous control etc.). These forests must be protected from industrial development  
113 impacts that degrade them through sensible public and private sector policy that is effective at  
114 relevant scales <sup>12,34</sup>. Our global assessment reveals where these places are found, and can be  
115 refined at more local scales where better data are available.

116  
117 Around a third of global forests had already been cleared by 2000 <sup>35</sup>, and we show that at least  
118 59% of what remains has low to medium integrity, with > 50% falling in these two broad  
119 categories in every biogeographical realm. These levels of human modification result partly from  
120 the large areas affected by relatively diffuse anthropogenic pressures whose presence is inferred  
121 near forest edges, and by lost connectivity. We also map a surprising level of more localized,  
122 observed pressures, such as infrastructure and recent forest loss, which are seen in nearly a third  
123 of forested pixels worldwide.

24

25 Conservation strategies in these more heavily human-modified forests should focus on securing  
26 any remaining fragments of forests in good condition, proactively protecting those forests most  
27 vulnerable to further modification <sup>7</sup> and planning where restoration efforts might be most  
28 effective <sup>36-38</sup>. In addition, effective management of production forests is needed to sustain yields  
29 without further worsening their ecological integrity <sup>39</sup>. More research is required on how to  
30 prioritize, manage, and restore forests with low to medium integrity <sup>38,40</sup>, and the FLII presented  
31 here might prove useful for this, for example, by helping prioritize where the best returns on  
32 investment are, in combination with other sources of data <sup>41</sup>.

33

34 Loss of forest integrity severely compromises many benefits of forests that are central to  
35 achieving multiple Sustainable Development Goals and other societal targets <sup>42,43</sup>. Therefore,  
36 governments must adopt policies and strategies to retain and restore the ecological integrity of  
37 their forests, whilst ensuring that the solutions are also economically viable, socially equitable,  
38 and politically acceptable within complex and highly diverse local contexts. This is an enormous  
39 challenge and our efforts to map the degree of forest modification are designed both to raise  
40 awareness of the importance of the issue, and to support implementation through target setting,  
41 evidence-based planning, and enhanced monitoring efforts.

42

43 Whilst policy targets for halting deforestation are generally precise and ambitious, only vague  
44 targets are typically stipulated around reducing levels of forest modification <sup>9,44</sup>. We urgently  
45 need SMART (specific, measurable, achievable, realistic, and time-bound) goals and targets for  
46 maintaining and restoring forest integrity that directly feed into higher-level biodiversity, climate,  
47 land degradation, and sustainable development goals <sup>45</sup>. These types of targets should be included  
48 within an over-arching target on ecosystems within the post-2020 Global Biodiversity

49 Framework, which is currently being negotiated among Parties to the CBD <sup>46</sup>. This target should  
50 be outcome-focused and address both the extent and the integrity of ecosystems (e.g. using FLII  
51 for forests), in a way that enables quantitative, measurable goals to be set but allows flexibility for  
52 implementation between Parties.

53

54 In addition to broader goals in global frameworks, the retention and restoration of forest integrity  
55 should also be addressed in nationally-defined goals embodied in, and aligned between,

56 Nationally Determined Contributions under the UNFCCC, efforts to stop land degradation and

57 achieve land degradation neutrality under the UNCCD, and National Biodiversity Strategy and

58 Action Plans under the CBD. Since no single metric can capture all aspects of a country's

59 environmental values, efforts to conserve high levels of forest integrity should be complemented

50 by consideration of areas support important values according to other measures (e.g. Key

51 Biodiversity Areas <sup>47</sup> and notable socio-cultural landscapes).

52

53 The overall level and pervasiveness of impacts on Earth's remaining forests is likely even more

54 severe than our findings suggest, because some input data layers, despite being the most

55 comprehensive available, are still incomplete as there are lags between increases in human

56 pressures and our ability to capture them in spatial datasets e.g., infrastructure, <sup>48,49</sup>, see also Fig. S1 and

57 <sup>text S5</sup>. For example, roads and seismic lines used for natural resource exploration and extraction in

58 British Columbia, Canada, are not yet fully reflected in global geospatial datasets Fig. S1; see also

59 <sup>50</sup>. Furthermore, because natural fires are such an important part of the ecology of many forest

70 systems (e.g. boreal forests) and because we cannot consistently identify anthropogenic fires from

71 natural fires at a global scales <sup>51</sup> we have taken a strongly conservative approach to fire in our

72 calculations, treating all tree cover loss in 10 km pixels where fire was the dominant driver (23) as

73 temporary, and not treating such canopy loss as evidence of observed human pressure. Varying

74 these assumptions where human activity is shown to be causing permanent tree cover losses,  
75 increasing fire return frequencies, or causing fire in previously fire-free systems would result in  
76 lower forest extent and/or lower forest integrity scores in some regions than we report.

77

78 We map forest integrity based on quantifiable processes over the recent past (since 2000). In  
79 some areas modification that occurred prior to this (e.g. historical logging) is not detectable by  
80 our methods but may have influenced the present-day integrity of the forest so, in such cases, we  
81 may overestimate forest integrity. This is another reason why our index should be considered as  
82 conservative, and we therefore recommend that the index be used alongside other lines of  
83 evidence to determine the absolute level of ecological integrity of a given area. Moreover, the  
84 definition of forest in this study is all woody vegetation taller than 5 m, following <sup>22</sup> and hence  
85 includes not only naturally regenerated forests but also tree crops, planted forests, wooded  
86 agroforests and urban tree cover in some cases. Users should be mindful of this when interpreting  
87 the results, especially when observing areas with low forest integrity scores. Inspection of the  
88 results for selected countries with reliable plantation maps <sup>52</sup> shows that the great majority of  
89 planted forests have low forest integrity scores, because they are invariably associated with dense  
90 infrastructure, frequent canopy replacement and patches of farmland.

91

92 We note our measure of forest integrity does not address past, current and future climate change.  
93 As climate change affects forest condition both directly and indirectly, this is a clear shortfall and  
94 needs research attention. The same is true for invasive species, as there is no globally coherent  
95 data on the range of those invasive species that degrade forest ecosystems, although this issue is  
96 indirectly addressed since the presence of many invasive species are likely spatially correlated  
97 with the human pressures that we use as drivers in our model <sup>53</sup>. If global data became available it  
98 would also be valuable to incorporate governance effectiveness into our model, because there are

99 potentially contexts (e.g. well-managed protected areas and community lands, production forests  
100 under ‘sustainable forest management’) where the impacts associated with the human pressures  
101 we base our map on are at least partially ameliorated <sup>39</sup>, and enhanced governance is also likely to  
102 be a significant component of some future strategies to maintain and enhance forest integrity.

103  
104 The framework we present has great potential to be tailored for use at smaller scales, ranging  
105 from regional to national and sub-national scales, and even to individual management units.  
106 Forest definitions and the relative weights of the global parameters we use can be adjusted to fit  
107 local contexts and, in many cases, better local data could be substituted, or additional variables  
108 incorporated. This would increase the precision of the index in representing local realities, and  
109 increase the degree of ownership amongst national and local stakeholders whose decisions are so  
110 important in determining forest management trajectories.

## 112 **Methods**

113  
114 To produce our global Forest Landscape Integrity Index (FLII), we combined four sets of  
115 spatially explicit datasets representing: (i) forest extent <sup>22</sup>; (ii) ‘observed’ pressure from high  
116 impact, localized human activities for which spatial datasets exist, specifically: infrastructure,  
117 agriculture, and recent deforestation <sup>53</sup>; (iii) ‘inferred’ pressure associated with edge effects <sup>54</sup>, and  
118 other diffuse processes, (e.g. activities such as hunting and selective logging) <sup>55</sup> modelled using  
119 proximity to observed pressures; and iv) anthropogenic changes in forest connectivity due to  
120 forest loss <sup>56</sup> see Table S1 for data sources. These datasets were combined to produce an index score for  
121 each forest pixel (300m), with the highest scores reflecting the highest forest integrity (Fig 1), and  
122 applied to forest extent for the start of 2019. We use globally consistent parameters for all

23 elements (i.e. parameters do not vary geographically). All calculations were conducted in Google  
24 Earth Engine (GEE) <sup>57</sup>.

25

### 26 *Forest extent*

27

28 We derived a global forest extent map for 2019 by subtracting from the Global Tree Cover  
29 product for 2000 <sup>22</sup> annual Tree Cover Loss 2001-2018, except for losses categorized by Curtis  
30 and colleagues <sup>23</sup> as those likely to be temporary in nature (i.e. those due to fire, shifting  
31 cultivation and rotational forestry). We applied a canopy threshold of 20% based on related  
32 studies e.g. <sup>29,58</sup> and resampled to 300m resolution and used this resolution as the basis for the rest  
33 of the analysis (see text S1 for further mapping methods).

34

### 35 *Observed human pressures*

36

37 We quantify observed human pressures (P) within a pixel as the weighted sum of impact of  
38 infrastructure (I; representing the combined effect of 41 types of infrastructure weighted by their  
39 estimated general relative impact on forests (Table S3), agriculture (A) weighted by crop intensity  
40 (indicated by irrigation levels), and recent deforestation over the past 18 years (H; excluding  
41 deforestation from fire, see Discussion). Specifically, for pixel i:

42

$$43 \quad P_i = \exp(-\beta_1 I_i) + \exp(-\beta_2 A_i) + \exp(-\beta_3 H_i)$$

44

45 whereby the values of  $\beta$  were selected so that the median of the non-zero values for each  
46 component was 0.75. This use of exponents is a way of scaling variables with non-commensurate  
47 units so that they can be combined numerically, while also ensuring that the measure of observed

48 pressure is sensitive to change (increase or decrease) in the magnitude of any of the three  
49 components, even at large values of I, A or H. This is an adaptation of the ‘Human Footprint’  
50 methodology<sup>53</sup>. See text S3 for further details.

51  
52 *Inferred human pressures*

53  
54 Inferred pressures are the diffuse effects of a set of processes for which directly observed datasets  
55 do not exist, that include microclimate and species interactions relating to the creation of forest  
56 edges<sup>59</sup> and a variety of intermittent or transient anthropogenic pressures such as: selective  
57 logging, fuelwood collection, hunting; spread of fires and invasive species, pollution, and  
58 livestock grazing<sup>55,60,61</sup>. We modelled the collective, cumulative impacts of these inferred effects  
59 through their spatial association with observed human pressure in nearby pixels, including a  
60 decline in effect intensity according to distance, and a partitioning into stronger short-range and  
61 weaker long-range effects. The inferred pressure ( $P'$ ) on pixel  $i$  from source pixel  $j$  is:

62  
63 
$$P'_{i,j} = P_j (w_{i,j} + v_{i,j})$$

64  
65 where  $w_{i,j}$  is the weighting given to the modification arising from short-range pressure, as a  
66 function of distance from the source pixel, and  $v_{i,j}$  is the weighting given to the modification  
67 arising from long-range pressures.

68  
69 Short-range effects include most of the processes listed above, which together potentially affect  
70 most biophysical features of a forest, and predominate over shorter distances. In our model they  
71 decline exponentially, approach zero at 3 km, and are truncated to zero at 5 km (see text S4).

72

73  $w_{i,j} = \alpha \exp(-\lambda \times d_{i,j})$  [for  $d_{i,j} \leq 5$  km]

74  $w_{i,j} = 0$  [for  $d_{i,j} > 5$  km]

75

76 where  $\alpha$  is a constant set to ensure that the sum of the weights across all pixels in range is 1.85  
77 (see below),  $\lambda$  is a decay constant set to a value of 1 (see <sup>62</sup> and other references in text S4) and  $d_{i,j}$   
78 is the Euclidean distance between the centres of pixels  $i$  and  $j$  expressed in units of km.

79

30 Long-range effects include over-exploitation of high socio-economic value animals and plants,  
31 changes to migration and ranging patterns, and scattered fire and pollution events. We modelled  
32 long-range effects at a uniform level at all distances below 6 km and they then decline linearly  
33 with distance, conservatively reaching zero at a radius of 12 km <sup>55,63</sup> and other references in text S4.

34

35  $v_{i,j} = \gamma$  [for  $d_{i,j} \leq 6$  km]

36  $v_{i,j} = \gamma \times (12 - d_{i,j}) / 6$  [for  $6 \text{ km} < d_{i,j} \leq 12 \text{ km}$ ]

37  $v_{i,j} = 0$  [for  $d_{i,j} > 12$  km]

38

39 Where  $\gamma$  is a constant set to ensure that the sum of the weights across all pixels in range is 0.15  
40 and  $d_{i,j}$  is the Euclidean distance between the centres of pixels  $i$  and  $j$ , expressed in kilometres.

41

42 The form of the weighting functions for short- and long-range effects and the sum of the weights  
43 ( $\alpha + \gamma$ ) were specified based on a hypothetical reference scenario where a straight forest edge is  
44 adjacent to a large area with uniform human pressure, and ensuring that in this case total inferred  
45 pressure immediately inside the forest edge is equal to the pressure immediately outside, before  
46 declining with distance.  $\gamma$  is set to 0.15 to ensure that the long-range effects conservatively  
47 contribute no more than 5% to the final index in the same scenario, based on expert opinion and



98 supported e.g. Berzaghi *et al.* <sup>64</sup> regarding the approximate level of impact on values that would  
99 be affected by severe defaunation and other long-range effects.

100

101 The aggregate effect from inferred pressures ( $P'$ ) on pixel  $i$  from all  $n$  pixels within range ( $j=1$  to  
102  $j=n$ ) is then the sum of these individual, normalized, distance-weighted pressures, i.e.

103

$$104 \quad P'_i = \sum_{[j=1 \dots n]} P'_{ij}$$

105

106 *Loss of forest connectivity*

107

108 Average connectivity of forest around a pixel was quantified using a method adapted from Beyer  
109 *et al.* <sup>56</sup>. The connectivity  $C_i$  around pixel  $i$  surrounded by  $n$  other pixels within the maximum  
110 radius (numbered  $j=1, 2 \dots n$ ) is given by:

111

$$112 \quad C_i = \sum_{[j=1 \dots n]} (F_j G_{i,j})$$

113

114 where  $F_j$  is the forest extent is a binary variable indicating if forested (1) or not (0) and  $G_{i,j}$  is the  
115 weight assigned to the distance between pixels  $i$  and  $j$ .  $G_{i,j}$  uses a normalized Gaussian curve,  
116 with  $\sigma = 20\text{km}$  and distribution truncated to zero at  $4\sigma$  for computational convenience (see text  
117 S3). The large value of  $\sigma$  captures landscape connectivity patterns operating at a broader scale  
118 than processes captured by other data layers.  $C_i$  ranges from 0 to 1 ( $C_i \in [0,1]$ ).

119

120 Current Configuration ( $CC_i$ ) of forest extent in pixel  $i$  was calculated using the final forest extent  
121 map and compared to the Potential Configuration (PC) of forest extent without extensive human  
122 modification, so that areas with naturally low connectivity, e.g. coasts and natural vegetation

23 mosaics, are not penalized. PC was calculated from a modified version of the map of Laestadius  
24 *et al.*<sup>35</sup> and resampled to 300 m resolution (see text S2 for details). Using these two measures, we  
25 calculated Lost Forest Configuration (LFC) for every pixel as:

26

$$27 \quad \text{LFC}_i = 1 - (\text{CC}_i/\text{PC}_i)$$

28

29 Values of  $\text{CC}_i/\text{PC}_i > 1$  are assigned a value of 1 to ensure that LFC is not sensitive to apparent  
30 increases in forest connectivity due to inaccuracy in estimated potential forest extent – low values  
31 represent least loss, high values greatest loss ( $\text{LFC}_i \in [0,1]$ ).

32

### 33 *Calculating the Forest Landscape Integrity Index*

34

35 The three constituent metrics, LFC, P and P', all represent increasingly modified conditions the  
36 larger their values become. To calculate a forest integrity index in which larger values represent  
37 less degraded conditions we therefore subtract the sum of those components from a fixed large  
38 value (here, 3). Three was selected as our assessment indicates that values of  $\text{LFC} + \text{P} + \text{P}'$  of 3 or  
39 more correspond to the most severely degraded areas. The metric is also rescaled to a convenient  
40 scale (0-10) by multiplying by an arbitrary constant (10/3). The FLII for forest pixel  $i$  is thus  
41 calculated as:

42

$$43 \quad \text{FLII}_i = [10/3] * (3 - \min(3, [\text{P}_i + \text{P}'_i + \text{LFC}_i]))$$

44

45 where  $\text{FLII}_i$  ranges from 0 - 10, forest areas with no modification detectable using our methods  
46 scoring 10 and those with the most scoring 0.

47

48 *Illustrative forest integrity classes*

49

50 Whilst a key strength of the index is its continuous nature, the results can also be categorized for a  
51 range of purposes. In this paper three illustrative classes were defined, mapped and summarized  
52 to give an overview of broad patterns of integrity in the world's forests. The three categories were  
53 defined as follows.

54

55 *High Forest Integrity* (scores  $\geq 9.6$ ) Interiors and natural edges of more or less unmodified  
56 naturally-regenerated (i.e. non-planted) forest ecosystems, comprised entirely or almost entirely  
57 of native species, occurring over large areas either as continuous blocks or natural mosaics with  
58 non-forest vegetation; typically little human use other than low intensity recreation or spiritual  
59 uses and/or low intensity extraction of plant and animal products and/or very sparse presence of  
60 infrastructure; key ecosystem functions such as carbon storage, biodiversity and watershed  
61 protection and resilience expected to be very close to natural levels (excluding any effects from  
62 climate change) although some declines possible in the most sensitive elements (e.g. some high  
63 value hunted species).

54

55 *Medium Forest Integrity* (scores  $>6.0$  but  $<9.6$ ) Interiors and natural edges of naturally-  
56 regenerated forest ecosystems in blocks smaller than their natural extent but large enough to have  
57 some core areas free from strong anthropogenic edge effects (e.g. set asides within forestry areas,  
58 fragmented protected areas), dominated by native species but substantially modified by humans  
59 through a diversity of processes that could include fragmentation, creation of edges and proximity  
60 to infrastructure, moderate or high levels of extraction of plant and animal products, significant  
61 timber removals, scattered stand-replacement events such as swidden and/or moderate changes to

72 fire and hydrological regimes; key ecosystem functions such as carbon storage, biodiversity,  
73 watershed protection and resilience expected to be somewhat below natural levels (excluding any  
74 effects from climate change).

75  
76 *Low Forest Integrity* (score  $\leq 6.0$ ): Diverse range of heavily modified and often internally  
77 fragmented ecosystems dominated by trees, including (i) naturally regenerated forests, either in  
78 the interior of blocks or at edges, that have experienced multiple strong human pressures, which  
79 may include frequent stand-replacing events, sufficient to greatly simplify the structure and  
80 species composition and possibly result in significant presence of non-native species, (ii) tree  
81 plantations and, (iii) agroforests; in all cases key ecosystem functions such as carbon storage,  
82 biodiversity, watershed protection and resilience expected to be well below natural levels  
83 (excluding any effects from climate change).

84  
85 The numerical category boundaries were derived by inspecting FLII scores for a wide selection of  
86 benchmark locations whose forest integrity according to the category definitions was known to  
87 the authors, see text S6 and Table S4.

88

### 89 **Protected areas analysis**

90

91 Data on protected area location, boundary, and year of inscription were obtained from the  
92 February 2018 World Database on Protected Areas <sup>65</sup>. Following similar global studies e.g. <sup>66</sup>, we  
93 extracted protected areas from the WDPA database by selecting those areas that have a status of  
94 “designated”, “inscribed”, or “established”, and were not designated as UNESCO Man and  
95 Biosphere Reserves. We included only protected areas with detailed geographic information in  
96 the database, excluding those represented as a point only. To assess integrity of protected forest,

97 we extracted all 300m forest pixels that were at least 50% covered by a formal protected area and  
98 measured the average FLII score.

99  
100

## 101 **References and Notes**

102  
103

- 104 1 Seymour, F. & Harris, N. L. Reducing tropical deforestation. *Science* **365**, 756-757,  
105 doi:10.1126/science.aax8546 (2019).
- 106 2 Pearson, T. R. H., Brown, S., Murray, L. & Sidman, G. Greenhouse gas emissions from  
107 tropical forest degradation: an underestimated source. *Carbon Balance and Management*  
108 **12**, 3, doi:10.1186/s13021-017-0072-2 (2017).
- 109 3 Moen, J. *et al.* Eye on the Taiga: Removing Global Policy Impediments to Safeguard the  
110 Boreal Forest. *Conservation Letters* **7**, 408-418, doi:10.1111/conl.12098 (2014).
- 111 4 Erb, K.-H. *et al.* Unexpectedly large impact of forest management and grazing on global  
112 vegetation biomass. *Nature* **553**, 73-76, doi:10.1038/nature25138 (2018).
- 113 5 Scholes, R. *et al.* IPBES (2018): Summary for policymakers of the assessment report on  
114 land degradation and restoration of the Intergovernmental Science-Policy Platform on  
115 Biodiversity and Ecosystem Services. (2018).
- 116 6 Parrish, J. D., Braun, D. P. & Unnasch, R. S. Are we conserving what we say we are?  
117 Measuring ecological integrity within protected areas. *Bioscience* **53**, 851-860 (2003).
- 118 7 Cochrane, M. A. *et al.* Positive Feedbacks in the Fire Dynamic of Closed Canopy Tropical  
119 Forests. *Science* **284**, 1832-1835, doi:10.1126/science.284.5421.1832 (1999).
- 120 8 Erdozain, M. *et al.* Demand for provisioning ecosystem services as a driver of change in  
121 the Canadian boreal zone1. *Environmental Reviews* **27**, 166-184, doi:10.1139/er-2018-  
122 0064 (2018).
- 123 9 Watson, J. E. *et al.* The exceptional value of intact forest ecosystems. *Nature ecology &*  
124 *evolution*, 1 (2018).
- 125 10 Lewis, S. L. *et al.* Increasing carbon storage in intact African tropical forests. *Nature* **457**,  
126 1003, doi:10.1038/nature07771  
127 <https://www.nature.com/articles/nature07771#supplementary-information> (2009).
- 128 11 Mello, K. d., Valente, R. A., Randhir, T. O. & Vettorazzi, C. A. Impacts of tropical forest  
129 cover on water quality in agricultural watersheds in southeastern Brazil. *Ecological*  
130 *Indicators* **93**, 1293-1301, doi:<https://doi.org/10.1016/j.ecolind.2018.06.030> (2018).
- 131 12 Garnett, S. T. *et al.* A spatial overview of the global importance of Indigenous lands for  
132 conservation. *Nature Sustainability* **1**, 369-374, doi:10.1038/s41893-018-0100-6 (2018).
- 133 13 Bonan, G. B. Forests and Climate Change: Forcings, Feedbacks, and the Climate Benefits  
134 of Forests. *Science* **320**, 1444-1449, doi:10.1126/science.1155121 (2008).
- 135 14 Barlow, J. *et al.* Anthropogenic disturbance in tropical forests can double biodiversity loss  
136 from deforestation. *Nature* **535**, 144, doi:10.1038/nature18326 (2016).
- 137 15 Betts, M. G. *et al.* Global forest loss disproportionately erodes biodiversity in intact  
138 landscapes. *Nature* **547**, 441, doi:10.1038/nature23285  
139 <https://www.nature.com/articles/nature23285#supplementary-information> (2017).
- 140 16 Gibson, L. Primary forests are irreplaceable for sustaining tropical biodiversity. *Nature*  
141 **478**, doi:10.1038/nature10425 (2011).
- 142 17 Di Marco, M., Ferrier, S., Harwood, T. D., Hoskins, A. J. & Watson, J. E. M. Wilderness  
143 areas halve the extinction risk of terrestrial biodiversity. *Nature* **573**, 582-585,  
144 doi:10.1038/s41586-019-1567-7 (2019).

- 45 18 Laurance, W. F. & Peres, C. A. *Emerging threats to tropical forests*. (University of  
46 Chicago Press, 2006).
- 47 19 Gauthier, S., Bernier, P., Kuuluvainen, T., Shvidenko, A. & Schepaschenko, D. Boreal  
48 forest health and global change. *Science* **349**, 819-822 (2015).
- 49 20 FAO. Assessing forest degradation. Towards the development of globally applicable  
50 guidelines. . (FAO, Rome, 2011).
- 51 21 FAO. Global Forest Land-Use Change 1990-2005. (Food and Agriculture Organisation of  
52 the United Nations, Rome, 2012).
- 53 22 Hansen, M. C. *et al.* High-Resolution Global Maps of 21st-Century Forest Cover Change.  
54 *Science* **342**, 850-853, doi:10.1126/science.1244693 (2013).
- 55 23 Curtis, P. G., Slay, C. M., Harris, N. L., Tyukavina, A. & Hansen, M. C. Classifying  
56 drivers of global forest loss. *Science* **361**, 1108-1111, doi:10.1126/science.aau3445  
57 (2018).
- 58 24 Mitchell, A. L., Rosenqvist, A. & Mora, B. Current remote sensing approaches to  
59 monitoring forest degradation in support of countries measurement, reporting and  
60 verification (MRV) systems for REDD+. *Carbon Balance and Management* **12**, 9,  
61 doi:10.1186/s13021-017-0078-9 (2017).
- 62 25 Wang, Y. *et al.* Mapping tropical disturbed forests using multi-decadal 30 m optical  
63 satellite imagery. *Remote Sensing of Environment* **221**, 474-488,  
64 doi:<https://doi.org/10.1016/j.rse.2018.11.028> (2019).
- 65 26 Venter, O. *et al.* Sixteen years of change in the global terrestrial human footprint and  
66 implications for biodiversity conservation. *Nature Communications* **7**, 12558 (2016).
- 67 27 Shapiro, A. C., Aguilar-Amuchastegui, N., Hostert, P. & Bastin, J.-F. Using fragmentation  
68 to assess degradation of forest edges in Democratic Republic of Congo. *Carbon Balance  
69 and Management* **11**, 11, doi:10.1186/s13021-016-0054-9 (2016).
- 70 28 Hansen, A. *et al.* Global humid tropics forest structural condition and forest structural  
71 integrity maps. *Scientific Data* **6**, 232, doi:10.1038/s41597-019-0214-3 (2019).
- 72 29 Potapov, P. *et al.* The last frontiers of wilderness: Tracking loss of intact forest landscapes  
73 from 2000 to 2013. *Science Advances* **3**, doi:10.1126/sciadv.1600821 (2017).
- 74 30 Watson, James E. M. *et al.* Catastrophic Declines in Wilderness Areas Undermine Global  
75 Environment Targets. *Current Biology* **26**, 2929-2934,  
76 doi:<https://doi.org/10.1016/j.cub.2016.08.049> (2016).
- 77 31 Olson, D. M. & Dinnerstein, E. G. The Global 200: a representation approach to  
78 conserving the Earth's most biologically valuable ecoregions. *Conserv. Biol.* **12**, 502-515  
79 (1998).
- 80 32 Pressey, R. L., Watts, M. E. & Barret, T. W. Is maximising protection the same as  
81 minimizing loss? Efficiency and retention as alternative measures of the effectiveness of  
82 proposed reserves. *Ecol Letters* **7**, 1035-1046 (2004).
- 83 33 Maron, M., Simmonds, J. S. & Watson, J. E. M. Bold nature retention targets are essential  
84 for the global environment agenda. *Nature Ecology & Evolution* **2**, 1194-1195,  
85 doi:10.1038/s41559-018-0595-2 (2018).
- 86 34 Dudley, N. *et al.* The essential role of other effective area-based conservation measures in  
87 achieving big bold conservation targets. *Global Ecology and Conservation* **15**, e00424,  
88 doi:<https://doi.org/10.1016/j.gecco.2018.e00424> (2018).
- 89 35 Laestadius, L. *et al.* Opportunities for forest landscape restoration. *Unasylva* **62**, 238  
90 (2011).
- 91 36 Edwards, D. P., Tobias, J. A., Sheil, D., Meijaard, E. & Laurance, W. F. Maintaining  
92 ecosystem function and services in logged tropical forests. *Trends Ecol. Evol.* **29**,  
93 doi:10.1016/j.tree.2014.07.003 (2014).

- 37 Runting, R. K. *et al.* Larger gains from improved management over sparing–sharing for  
38 tropical forests. *Nature Sustainability* **2**, 53-61, doi:10.1038/s41893-018-0203-0 (2019).
- 39 Chazdon, R. L. *et al.* A Policy-Driven Knowledge Agenda for Global Forest and  
40 Landscape Restoration. *Conservation Letters* **10**, 125-132, doi:doi:10.1111/conl.12220  
41 (2017).
- 42 MacDicken, K. G. *et al.* Global progress toward sustainable forest management. *For.*  
43 *Ecol. Manage.* **352**, 47-56, doi:<https://doi.org/10.1016/j.foreco.2015.02.005> (2015).
- 44 Ghazoul, J. & Chazdon, R. Degradation and Recovery in Changing Forest Landscapes: A  
45 Multiscale Conceptual Framework. *Annual Review of Environment and Resources* **42**,  
46 161-188, doi:10.1146/annurev-environ-102016-060736 (2017).
- 47 Strassburg, B. B. N. *et al.* Strategic approaches to restoring ecosystems can triple  
48 conservation gains and halve costs. *Nature Ecology & Evolution* **3**, 62-70,  
49 doi:10.1038/s41559-018-0743-8 (2019).
- 50 Pandit, R. *et al.* Summary for policymakers of the assessment report on land degradation  
51 and restoration of the Intergovernmental Science-Policy Platform on Biodiversity and  
52 Ecosystem Services. (2018).
- 53 Osuri, A. M. *et al.* Contrasting effects of defaunation on aboveground carbon storage  
54 across the global tropics. *Nature Communications* **7**, 11351, doi:10.1038/ncomms11351  
55 <https://www.nature.com/articles/ncomms11351#supplementary-information> (2016).
- 56 Mackey, B. Policy options for the world’s primary forests in multilateral environmental  
57 agreements. *Conserv. Lett.* **8**, doi:10.1111/conl.12120 (2015).
- 58 Butchart, S. H. M., Di Marco, M. & Watson, J. E. M. Formulating Smart Commitments on  
59 Biodiversity: Lessons from the Aichi Targets. *Conservation Letters* **9**, 457-468,  
60 doi:10.1111/conl.12278 (2016).
- 61 Watson, J. E. *et al.* (Nature Publishing Group, 2020).
- 62 Stuart, S. N. *et al.* Clarifying the key biodiversity areas partnership and programme.  
63 *Biodivers. Conserv.* **27**, 791-793, doi:10.1007/s10531-017-1490-x (2018).
- 64 Barrington-Leigh, C. & Millard-Ball, A. The world’s user-generated road map is more  
65 than 80% complete. *PLOS ONE* **12**, e0180698, doi:10.1371/journal.pone.0180698 (2017).
- 66 Hughes, A. C. Have Indo-Malaysian forests reached the end of the road? *Biol. Conserv.*  
67 **223**, 129-137, doi:<https://doi.org/10.1016/j.biocon.2018.04.029> (2018).
- 68 Pasher, J., Seed, E. & Duffe, J. Development of boreal ecosystem anthropogenic  
69 disturbance layers for Canada based on 2008 to 2010 Landsat imagery. *Canadian Journal*  
70 *of Remote Sensing* **39**, 42-58, doi:10.5589/m13-007 (2013).
- 71 Erb, K.-H. *et al.* Land management: data availability and process understanding for global  
72 change studies. *Global Change Biol.* **23**, 512-533, doi:10.1111/gcb.13443 (2016).
- 73 Harris, N., E. , Goldman, L. & Gibbes, S. Spatial Database of Planted Trees (SDPT)  
74 Version 1.0. (World Resources Institute, Washington, DC, 2018).
- 75 Venter, O. Sixteen years of change in the global terrestrial human footprint and  
76 implications for biodiversity conservation. *Nat. Commun.* **7**, doi:10.1038/ncomms12558  
77 (2016).
- 78 Haddad, N. M. *et al.* Habitat fragmentation and its lasting impact on Earth’s ecosystems.  
79 *Science Advances* **1**, e1500052, doi:10.1126/sciadv.1500052 (2015).
- 80 Peres, C. A., Emilio, T., Schiatti, J., Desmoulière, S. J. M. & Levi, T. Dispersal limitation  
81 induces long-term biomass collapse in overhunted Amazonian forests. *Proceedings of the*  
82 *National Academy of Sciences* **113**, 892-897, doi:10.1073/pnas.1516525113 (2016).
- 83 Beyer, H. L., Venter, O., Grantham, H. S. & Watson, J. E. M. Substantial losses in  
84 ecoregion intactness highlight urgency of globally coordinated action. *Conservation*  
85 *Letters* **n/a**, e12592, doi:10.1111/conl.12692.

- 43 57 Gorelick, N. *et al.* Google Earth Engine: Planetary-scale geospatial analysis for everyone.  
44 *Remote Sensing of Environment* **202**, 18-27, doi:<https://doi.org/10.1016/j.rse.2017.06.031>  
45 (2017).
- 46 58 Heino, M. *et al.* Forest Loss in Protected Areas and Intact Forest Landscapes: A Global  
47 Analysis. *PLOS ONE* **10**, e0138918, doi:10.1371/journal.pone.0138918 (2015).
- 48 59 Laurance, W. F. *et al.* Ecosystem decay of Amazonian forest fragments: a 22-year  
49 investigation. *Conserv. Biol.* **16**, 605-618 (2002).
- 50 60 Cochrane, M. A. & Laurance, W. F. Fire as a large-scale edge effect in Amazonian  
51 forests. *Journal of Tropical Ecology* **18**, 311-325, doi:10.1017/S0266467402002237  
52 (2002).
- 53 61 Zimmerman, B. L. & Kormos, C. F. Prospects for Sustainable Logging in Tropical  
54 Forests. *Bioscience* **62**, 479-487, doi:10.1525/bio.2012.62.5.9 (2012).
- 55 62 Chaplin-Kramer, R. *et al.* Degradation in carbon stocks near tropical forest edges. *Nature*  
56 *Communications* **6**, 10158, doi:10.1038/ncomms10158  
57 <https://www.nature.com/articles/ncomms10158#supplementary-information> (2015).
- 58 63 Maisels, F. *et al.* Devastating Decline of Forest Elephants in Central Africa. *PLOS ONE* **8**,  
59 e59469, doi:10.1371/journal.pone.0059469 (2013).
- 60 64 Berzaghi, F. *et al.* Carbon stocks in central African forests enhanced by elephant  
61 disturbance. *Nature Geoscience* **12**, 725-729, doi:10.1038/s41561-019-0395-6 (2019).
- 62 65 IUCN, U.-W. a. Protected Planet: The World Database on Protected Areas (WDPA).  
63 (UNEP-WCMC, Cambridge, UK, 2018).
- 64 66 Butchart, S. H. M. *et al.* Shortfalls and Solutions for Meeting National and Global  
65 Conservation Area Targets. *Conservation Letters* **8**, 329-337, doi:10.1111/conl.12158  
66 (2015).
- 67 67 Gibson, L. *et al.* Primary forests are irreplaceable for sustaining tropical biodiversity.  
68 *Nature* **478**, 378-381 (2011).
- 69 68 ESA. Land Cover CCI Product User Guide Version 2. Tech. Rep., (2017).
- 70 69 Theobald, D. M. A general model to quantify ecological integrity for landscape  
71 assessments and US application. *Landscape Ecol.* **28**, 1859-1874 (2013).
- 72 70 Sanderson, E. W. *et al.* The human footprint and the last of the wild. *Bioscience* **52**, 891-  
73 904 (2002).
- 74 71 Kennedy, C. M., Oakleaf, J. R., Theobald, D. M., Baruch-Mordo, S. & Kiesecker, J.  
75 Managing the middle: A shift in conservation priorities based on the global human  
76 modification gradient. *Global Change Biol.* **25**, 811-826 (2019).
- 77 72 Thompson, I. D. *et al.* An Operational Framework for Defining and Monitoring Forest  
78 Degradation. *Ecology and Society* **18** (2013).
- 79 73 Contributors. (ed OpenStreetMap) (2015).
- 80 74 Teluguntla, P. *et al.* (ed NASA EOSDIS Land Processes DAAC) (2016).
- 81 75 Tulloch, A. I., Gordon, A., Runge, C. A. & Rhodes, J. R. Integrating spatially realistic  
82 infrastructure impacts into conservation planning to inform strategic environmental  
83 assessment. *Conservation Letters* **12**, e12648 (2019).
- 84 76 Benítez-López, A., Alkemade, R. & Verweij, P. A. The impacts of roads and other  
85 infrastructure on mammal and bird populations: a meta-analysis. *Biol. Conserv.* **143**,  
86 1307-1316 (2010).
- 87 77 Broadbent, E. N. *et al.* Forest fragmentation and edge effects from deforestation and  
88 selective logging in the Brazilian Amazon. *Biol. Conserv.* **141**, 1745-1757 (2008).
- 89 78 Benítez-López, A., Santini, L., Schipper, A. M., Busana, M. & Huijbregts, M. A. J. Intact  
90 but empty forests? Patterns of hunting-induced mammal defaunation in the tropics. *PLOS*  
91 *Biology* **17**, e3000247, doi:10.1371/journal.pbio.3000247 (2019).



- 79 Lamarche, C. *et al.* Compilation and validation of SAR and optical data products for a  
80 complete and global map of inland/ocean water tailored to the climate modeling  
81 community. *Remote Sensing* **9**, 36 (2017).
- 82 Gumma, M. *et al.* NASA Making Earth System Data Records for Use in Research  
83 Environments (MEaSUREs) Global Food Security-support Analysis Data (GFSAD)  
84 Cropland Extent 2015 South Asia, Afghanistan, Iran 30 m V001. (2017).
- 85 Massey, R. *et al.* (ed NASA EOSDIS Land Processes DAAC) (2017).
- 86 Oliphant, A. *et al.* NASA Making Earth System Data Records for Use in Research  
87 Environments (MEaSUREs) Global Food Security-support Analysis Data (GFSAD)  
88 Cropland Extent 2015 Southeast Asia 30 m V001. (2017).
- 89 Phalke, A. *et al.* (ed NASA EOSDIS Land Processes DAAC) (2017).
- 90 Teluguntla, P. *et al.* NASA Making Earth System Data Records for Use in Research  
91 Environments (MEaSUREs) Global Food Security-support Analysis Data (GFSAD)  
92 Cropland Extent 2015 Australia, New Zealand, China, Mongolia 30 m V001. (2017).
- 93 Xiong, J. *et al.* NASA Making Earth System Data Records for Use in Research  
94 Environments (MEaSUREs) Global Food Security-support Analysis Data (GFSAD)  
95 Cropland Extent 2015 Africa 30 m V001. (2017).
- 96 Zhong, Y. *et al.* (ed NASA EOSDIS Land Processes DAAC) (2017).
- 97 Pekel, J.-F., Cottam, A., Gorelick, N. & Belward, A. S. High-resolution mapping of global  
98 surface water and its long-term changes. *Nature* **540**, 418-422 (2016).

15 **Acknowledgments:** We thank Peter Potapov, Dmitry Aksenov, and Matthew Hansen for  
16 comments and advice.

17  
18 **Funding:** The research for this paper was in part funded by the John D. and Catherine T.  
19 MacArthur Foundation, Natasha and Dirk Ziff, Trillion Trees (a joint venture between  
20 BirdLife International, Wildlife Conservation Society, and WWF-UK), and other generous  
21 donors.

22  
23 **Author contributions:** Conceived and design the study: HG, TE and JEW, collected data and  
24 developed the model: AD, HG, TE, HB, RS, analyzed and interpreted the results: AD,  
25 HG, TE, HB, RS, KJ, JEW, wrote draft manuscript: HG, TE and JEW, contributed to the  
26 writing of the manuscript: all co-authors.

27

28 **Competing interests:** There are no competing interests

29

30 **Data and materials availability:** Data will be available for download when published.

31

32

### 33 **Figures and Tables**

34

35 **Table 1.** A summary of the Forest Landscape Integrity Index scores for each biogeographic realm  
36 globally, measuring the mean score, in addition to the area and proportion of realm for each  
37 category of integrity. Scores are divided into three categories of integrity: high, medium and low.

38

39 **Table 2.** A summary of the Forest Landscape Integrity Index scores for each type of protected  
40 area designation based on the IUCN Protected Areas categories measuring mean score, in  
41 addition to the area and proportion of realm for each category of integrity. Scores are divided into  
42 three categories of integrity: high, medium and low.

43

44 **Figure 1.** The Forest Landscape Integrity Index was constructed based on three main data inputs:  
45 1) observed pressures (infrastructure, agriculture, tree cover loss), 2) inferred pressure modelled  
46 based on proximity to the observed pressures, and 3) change in forest connectivity.

47

48 **Figure 2.** A global map of Forest Landscape Integrity for 2019. Three regions are highlighted  
49 including A) USA, B) Equatorial Guinea C) Myanmar. For a) shows the edge of Smoky  
50 Mountains National Park in Tennessee b) shows a logging truck passing through some partially  
51 degraded forest along a newly constructed highway in Shan State, c) shows an intact mangrove

52 forest within Reserva Natural del Estuario del Muni, near the border with Gabon. The stars  
53 indicate approximately where the photos were taken (A2, B2 and C2).

54

55 **Figure 3.** The Forest Landscape Integrity Index for 2019 categorized into three broad, illustrative  
56 classes and mapped for across each biogeographic realm (A – G). The size of the pie charts  
57 indicates the relative size of the forests within each realm (A - G), and H shows all the world's  
58 forest combined.

59

50 **Figure 4.** The Forest Landscape Integrity Index for 2019 categorized into three broad, illustrative  
51 classes for each major forested country in the world. (A) countries with a forest extent larger than  
52 1 million km<sup>2</sup>, and (B) countries with forest extent between 1 million km<sup>2</sup> and 100,000 km<sup>2</sup> of  
53 forest. The size of the bar represents the area of a country's forests.

54

55

56

57

58 Table 1  
59

| Biogeographic Realm | Total forest          | FLII        | High (9.6 - 10)       |                   | Medium (6 - 9.6)      |                   | Low (0 - 6)           |                   |
|---------------------|-----------------------|-------------|-----------------------|-------------------|-----------------------|-------------------|-----------------------|-------------------|
|                     | <i>Km<sup>2</sup></i> | <i>Mean</i> | <i>Km<sup>2</sup></i> | <i>% of realm</i> | <i>Km<sup>2</sup></i> | <i>% of realm</i> | <i>Km<sup>2</sup></i> | <i>% of realm</i> |
| Afrotropic          | 7,362,740             | 7.34        | 2,450,953             | 33.3              | 2,903,483             | 39.4              | 2,008,304             | 27.3              |
| Australasia         | 1,711,684             | 8.05        | 656,701               | 38.4              | 753,188               | 44.0              | 301,796               | 17.6              |
| Indo-malayan        | 3,596,249             | 5.9         | 420,977               | 11.7              | 1,599,049             | 44.5              | 1,576,223             | 43.8              |
| Neotropic           | 10,271,519            | 7.81        | 4,579,406             | 44.6              | 3,122,706             | 30.4              | 2,569,407             | 25.0              |
| Oceania             | 23,389                | 7.66        | 5,279                 | 22.6              | 14,331                | 61.3              | 3,780                 | 16.2              |
| Palaearctic         | 12,172,668            | 8           | 5,571,997             | 45.8              | 3,910,629             | 32.1              | 2,690,042             | 22.1              |
| Nearctic            | 7,794,117             | 7.84        | 3,716,855             | 47.7              | 2,257,518             | 29.0              | 1,819,744             | 23.3              |
| <b>Total</b>        | 42,932,367            | 7.76        | 17,402,170            |                   | 14,560,903            |                   | 10,969,294            |                   |

70

771 Table 2.  
 772  
 773  
 774

| Protected Area Category                                       | Total forest<br><i>Km<sup>2</sup></i> | FLII<br><i>Mean</i> | High<br>(score 9.6 - 10) |                            | Medium<br>(score 6 – 9.6) |                            | Low<br>(score 0 - 6)  |                            |
|---------------------------------------------------------------|---------------------------------------|---------------------|--------------------------|----------------------------|---------------------------|----------------------------|-----------------------|----------------------------|
|                                                               |                                       |                     | <i>Km<sup>2</sup></i>    | <i>% of protected area</i> | <i>Km<sup>2</sup></i>     | <i>% of protected area</i> | <i>Km<sup>2</sup></i> | <i>% of protected area</i> |
| Ia (strict nature reserve)                                    | 439,082                               | 9.27                | 304,329                  | 69.31                      | 106,703                   | 24.3                       | 28,049                | 6.39                       |
| Ib (wilderness area)                                          | 367,330                               | 9.22                | 240,453                  | 65.46                      | 102,096                   | 27.79                      | 24,780                | 6.75                       |
| II (national park)                                            | 1,900                                 | 9.14                | 1,223,138                | 64.38                      | 540,805                   | 28.46                      | 136,056               | 7.16                       |
| III (natural monument or feature)                             | 113,805                               | 8.49                | 54,476                   | 47.87                      | 40,021                    | 35.17                      | 19,308                | 16.97                      |
| IV (habitat/species management area)                          | 838,707                               | 8.69                | 432,828                  | 51.61                      | 268,027                   | 31.96                      | 137,850               | 16.44                      |
| V (protected landscape/seascape)                              | 840,919                               | 6.4                 | 224,491                  | 26.7                       | 295,769                   | 35.17                      | 320,658               | 38.13                      |
| VI (Protected area with sustainable use of natural resources) | 1,472,278                             | 9.21                | 1,026,169                | 69.7                       | 344,617                   | 23.41                      | 101,491               | 6.89                       |
| Not Applicable / Not Assigned / Not Reported                  | 2,613,541                             | 8.29                | 1,030,430                | 39.42                      | 906,745                   | 34.69                      | 676,365               | 25.88                      |
| <b>All Protected Areas</b>                                    | <b>8,585,661</b>                      | <b>8.55</b>         | <b>4,536,314</b>         | <b>52.83</b>               | <b>2,694,784</b>          | <b>30.34</b>               | <b>1,444,562</b>      | <b>16.82</b>               |

75 Fig 1

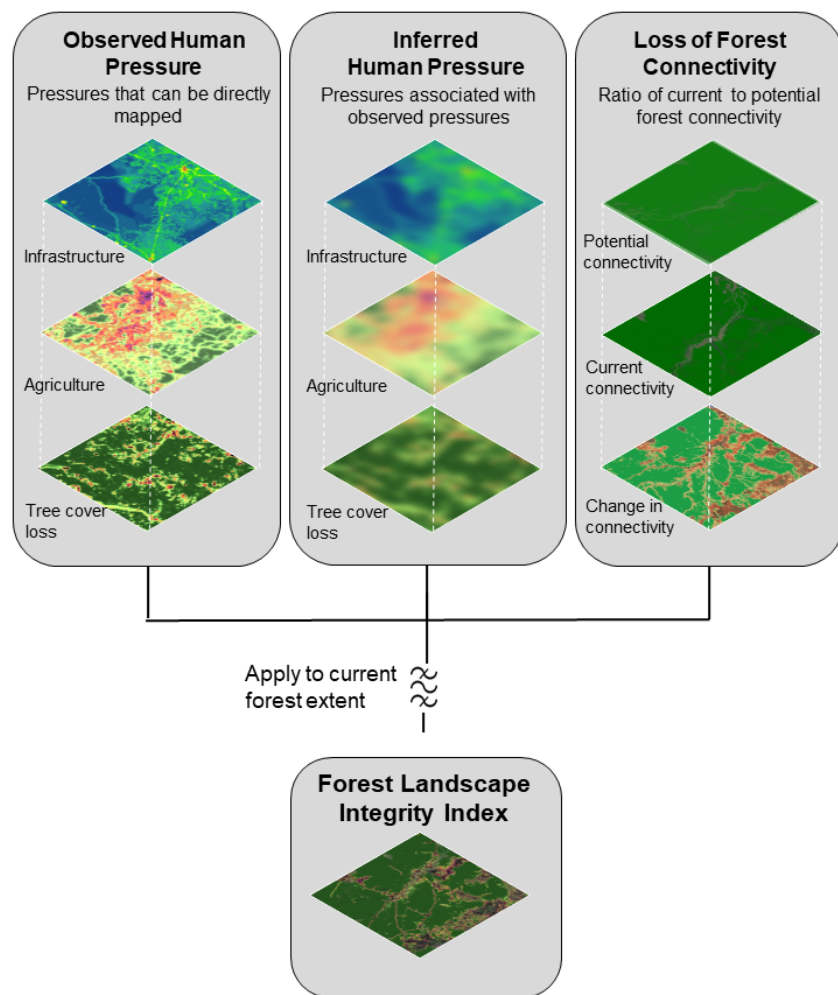

76  
77  
78

79 Fig 2  
30

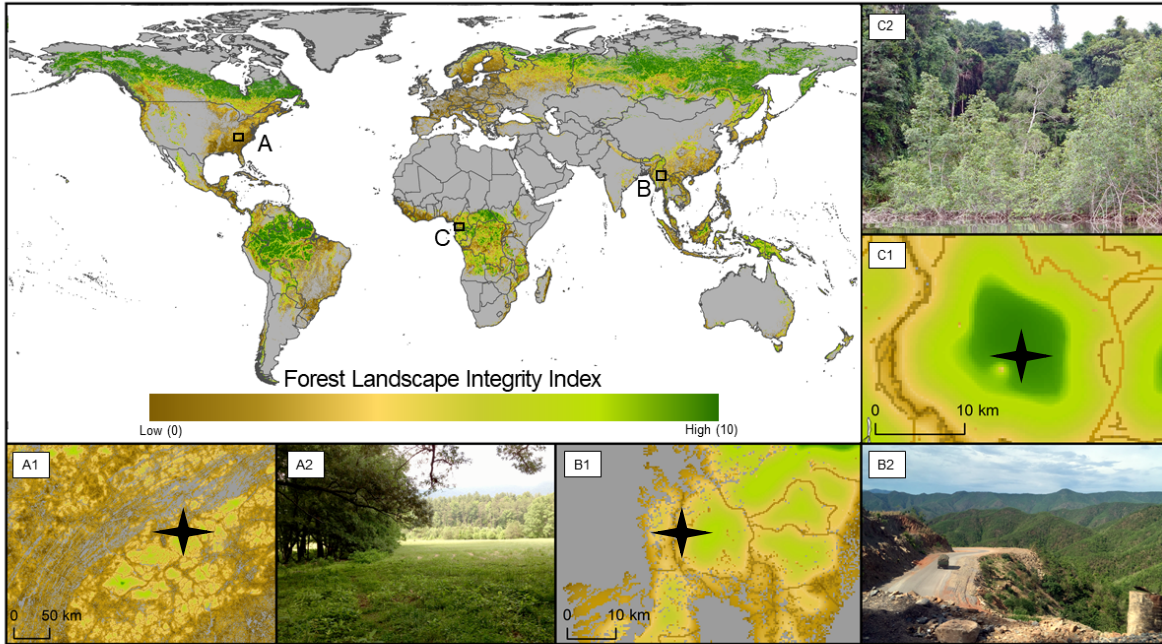

31  
32

33 Fig 3  
34

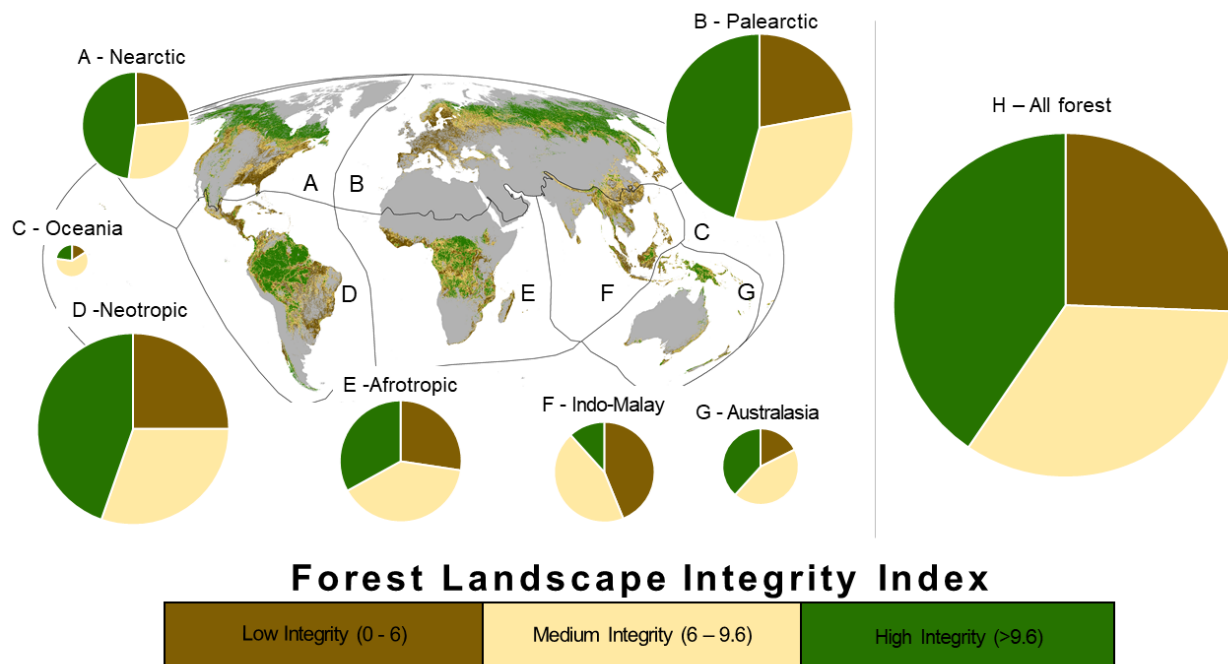

35  
36



37  
38

Fig 4.

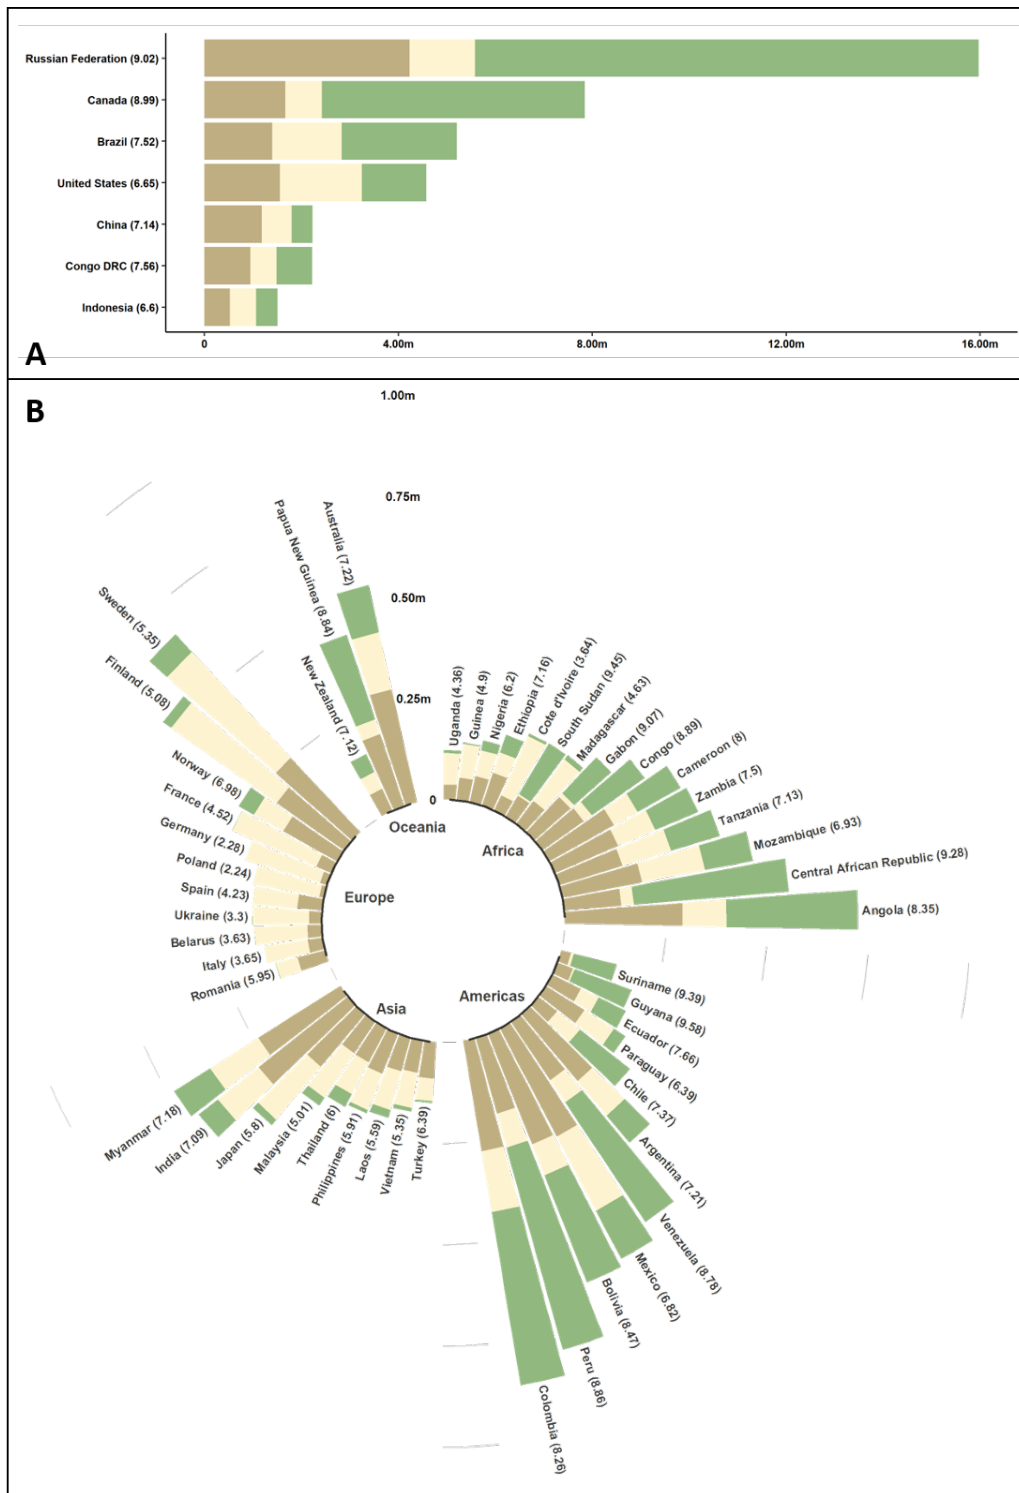

39  
40  
41

## 92 **Supplementary Materials**

93

### 94 **Text S1. Mapping forest extent**

95

96 We generated a preliminary base map of global forest extent for the start of 2019 at 30 m  
97 resolution by subtracting annual Tree Cover Loss 2001-2018 (with exceptions noted in the next  
98 paragraph) from the Global Tree Cover 2000 product <sup>22</sup> using a canopy cover threshold of 20%.  
99 This is one of the most widely used tree cover datasets globally, so it has been widely tested in  
100 many settings and its strengths and constraints are well understood. It has many advantages,  
101 including its high resolution, high accuracy, global coverage, annual time series and good  
102 prospects of sustainability in the coming years. The definition of forest in the source dataset is all  
103 woody vegetation taller than 5 m and hence includes naturally regenerated forests as well as tree  
104 crops, planted forests, wooded agroforests and urban tree cover. No globally consistent dataset  
105 was available that allowed natural and planted tree cover to be consistently distinguished in this  
106 study. Therefore, we should be mindful of the many differences between planted and natural tree  
107 cover (e.g.<sup>67</sup>).

108

109 More than 70% of the tree cover loss shown by the Hansen *et al.* <sup>22</sup> products has been found to be  
110 in 10 km pixels where the dominant loss driver is temporary and so tree cover is expected to  
111 return above the forest definition threshold within a short period <sup>23</sup>. It is important to take account  
112 of this issue as treating all such areas as permanent loss would severely under-estimate current  
113 forest cover in many regions. However, no global map of forest cover gain exists for the study  
114 period other than the 2000-2012 gain product from Hansen *et al.* <sup>22</sup>, so we developed an  
115 alternative approach. When removing annual loss shown by the Global Tree Cover Loss product  
116 cited above we elected not to remove any loss that was in a 10 km pixel categorized by Curtis *et*

17 *al.*<sup>23</sup> as dominated by temporary loss under the categories of fire, shifting cultivation or rotational  
18 forestry. This resulted in the adjusted preliminary forest base map. The balance of evidence is that  
19 the great majority of such areas would have begun to regenerate and hence qualify as forest by  
20 our definition again by 2019 or soon after<sup>23</sup>. The anthropogenically disturbed nature of many of  
21 these areas of temporary tree cover loss and recovery is reflected in scoring within the index,  
22 because temporary tree cover loss in the categories of shifting cultivation or rotational forestry is  
23 treated as an observed pressure. We do not treat tree cover loss through fire as an observed  
24 pressure, because fires are often part of natural processes, especially in the boreal zone. This  
25 makes our global index conservative as a measure of degradation in these zones, because in some  
26 locations fires are anthropogenic in nature.

27  
28 The adjusted preliminary base map was then resampled to a final base map for 2019 at 300m  
29 resolution using a pyramid-by-mode decision rule, with the resulting pixels simply classified as  
30 forest or non-forest based on a majority rule. The FLII was calculated for every forest pixel but  
31 not for non-forest pixels. GEE performs calculations in WGS84. Supplementary analyses outside  
32 GEE were applied using a Mollweide equal-area projection.

## 34 **Text S2. Mapping potential forest configuration**

35  
36 Potential connectivity (PC) is calculated from an estimate of the potential extent of the forest zone  
37 taken from Laestadius *et al.*<sup>35</sup>, treating areas below 25% crown cover (this was the nearest class  
38 to the threshold used in our tree cover dataset of 20%) as non-forest and resampling to 300 m  
39 resolution. To minimize false instances of lost connectivity and ensure measures of forest  
40 modification are conservative we masked from this data layer areas which we believe to include a  
41 significant proportion of naturally unforested land using selected land-cover categories in ESA

42 (68; see Table S1). Because these natural non-forest patches are shown in the Hansen *et al.* 22  
43 dataset but not Laestadius *et al.* 35, not excluding such classes would result in an inflated estimate  
44 of the loss of connectivity and hence the level of degradation. We have elected to remain  
45 conservative in our estimate of modification.

46

### 47 **Text S3. Mapping observed human pressure**

48

49 Several recent analyses have developed composite, multi-criteria indices of human pressure to  
50 provide assessments of ecosystem condition for the USA 69 or globally 26,70,71. Thompson *et al.* 72  
51 set out a framework specific to forest ecosystems that could indicate modification through a  
52 balanced mix of available pressure and state variables. We adapted the methodology of Venter *et*  
53 *al.* 26, informed by the other studies cited, to generate measures of (i) the modification of forest  
54 associated with observed human pressure from infrastructure, agriculture and deforestation and  
55 (ii) the more diffuse inferred modification effects (e.g. edge effects) whose presence is inferred  
56 from proximity to these focal areas of human activity. Edge effects resulting entirely from natural  
57 processes are excluded, because they do not represent modification by our definition, although,  
58 like many other natural factors, they do also have a role in determining ecosystem benefits.

59

#### 50 *Infrastructure*

51

52 We generated the infrastructure (I') data layer by rasterizing the OpenStreetMap data 73 from Feb  
53 2018, using weights for each type of infrastructure as noted in Table S3. The weights were  
54 derived from authors' expert opinion and experimentation with weights according to their relative  
55 impact on forest condition.

56

57 *Agriculture*

58

59 For agriculture (A') we made a global binary composite of the croplands datasets produced by the  
70 USGS (Table 1) at 30 m resolution, and weighted each cropped pixel at this resolution by the  
71 likely intensity of cropping using the global irrigation dataset at 1km resolution (Teluguntla et al,  
72 <sup>74</sup>), with values of Irrigation Major = 2, Irrigation Minor = 1.5, Rainfed = 1. The average  
73 cropping intensity (including uncropped areas, which score zero) was then calculated across the  
74 whole of each 300 m pixel of our final basemap.

75

76 *Deforestation*

77

78 For deforestation (H') we made a binary composite of tree cover loss 2001-2018 at 30 m  
79 resolution <sup>22</sup>, masked out 30 m pixels already classified as agriculture in the preceding step to  
80 avoid double-counting, and excluded loss predicted by Curtis *et al.* <sup>23</sup> to be most likely caused by  
81 fires, to give a conservative data layer of recent permanent and temporary tree cover loss  
82 indicative of human activity in the immediate vicinity. We excluded small clusters of 6 or fewer  
83 pixels (0.54 ha) because they may have been natural tree cover loss (e.g. small windthrows) or  
84 classification errors. Each 30 m pixel was then weighted by its year of loss, giving higher weight  
85 to the most recent loss (2001 = 1, 2002 = 2, etc.). The average 'recentness' of deforestation  
86 (including areas not deforested, which score zero) was then calculated across the whole of each  
87 300 m pixel of our base map.

88

89 *Transformations*

90

91 The exponential transformations described in the main text were used to convert I', A' and H' to  
92 the variables I, A and H respectively.

93

#### 94 **Text S4. Modelling inferred pressures using proximity to observed pressures**

95

96 Each cell also experiences modification as a result of pressures originating from nearby cells that  
97 have observed human pressures, largely through the family of processes known as 'edge effects'  
98 <sup>54</sup>. Edge effects are partly a result of the changes relating to biophysical factors (such as humidity,  
99 wind, temperature and the increased presence of non-forest species) that accompany the creation  
100 of new edges in formerly continuous forest (as exemplified by the carefully controlled studies in  
101 tropical forests summarized by Laurance *et al.* <sup>59</sup>). They also result in part from the increased  
102 pressure associated with human activities within tropical forest near to edges such as logging <sup>61</sup>,  
103 anthropogenic fire <sup>60</sup>, hunting <sup>55</sup>, livestock grazing, pollution, visual and auditory disturbances,  
104 etc. These multiple factors are synergistic and so we model them together, notwithstanding  
105 regional and local variations in the relative intensity of each one.

106

107 We model the inferred effect caused by each nearby source cell as a function of (a) the observed  
108 human pressure observed in that source cell and (b) a decline in the intensity of edge effects with  
109 distance from the source cell, based on a review of the literature. We then determine the total  
110 inferred effect on a given cell by summing the individual effects from all source cells within a  
111 certain range.

112

113 Two complementary types of inferred effect are modelled and added together. One relates to the  
114 diverse, strong, relatively short-range edge effects which decay to near zero over a few kilometers  
115 and have the potential to affect most biophysical features of a forest to a greater or lesser extent.

16 The other relates to weaker, longer-range effects such as over-hunting of high-value animals that  
17 affect fewer biophysical features of a forest (and so have a much smaller maximum effect on  
18 overall integrity) but can nonetheless have detectable effects in locations more than 10 km from  
19 the nearest permanent human presence.

20

21 The literature on the spatial influence of short-term effects uses a variety of mathematical  
22 descriptors, in two broad categories – continuous variables and distance belts. As we wish to  
23 model edge effects as a continuous variable we concentrated on studies that have taken a similar  
24 approach, and used distance-belt studies as ancillary data.

25

26 Chaplin-Kramer *et al.* <sup>62</sup> is a good example of a continuous variable approach, estimating detailed  
27 biomass loss curves near tropical forest edges. Because they analyze a key forest condition  
28 variable with a very large pantropical dataset we hypothesize that the exponential declines in  
29 degradation with distance that they find are likely to be a common pattern and so we use a similar  
30 framework for our more general model of degradation. We consider that a model of exponential  
31 decay is also a sufficient approximation to the evidence presented by some authors as graphs  
32 without an associated mathematical model (e.g., <sup>60,75</sup>) or analyzed using logistic regression (e.g.,  
33 <sup>76</sup>). In our model we set the exponential decay constant to be broadly consistent with these four  
34 studies, resulting in degradation at 1 km inside a forest that is approximately 37% of that at the  
35 forest edge, declining to 14% at 2 km and near zero at 3 km. We truncate the distribution at 5 km  
36 to minimize computational demands.

37

38 Distance-belt studies define the width of a belt within which edge effects are considered to occur,  
39 and beyond which forests are considered to be free of edge effect. Belts of 1 km are commonly  
40 used (e.g., <sup>54</sup>) but smaller distances may be used for specific parameters (e.g. 300 m for biomass

41 reduction near edges in DRC's primary forests; <sup>27</sup>). Our continuous variable approach is broadly  
42 consistent with these studies, with the majority of our modelled degradation within a 1 km belt  
43 and little extending beyond 2 km. While most individual edge effects reported in the literature  
44 penetrate less than 100-300 m (e.g., <sup>59,77</sup>) most of the effects reported on in these studies relate to  
45 the changed natural factors mentioned in an earlier paragraph, and are likely to be dwarfed in both  
46 intensity and extent by edge effects relating to spillovers of human activity, so our model  
47 emphasizes the spatial distribution of the latter (e.g., <sup>60</sup>). We consider our model of the levels of  
48 modification to be conservative.

49  
50 For the weaker, more widespread long-range effects we use recent large-scale studies of  
51 defaunation, which is one of the key long-range pressures and also acts as a proxy for other  
52 threats including harvest of high value plants (such as eaglewood *Aquilaria* spp. in tropical Asia),  
53 occasional remote fires, pollution associated with artisanal mining, etc. We adopt a simplified  
54 version of the distribution used by Peres *et al.* <sup>55</sup> to model hunting around settlements in the  
55 Amazon, which sets  $2\sigma=12$  km; this is likely conservative compared to evidence for hunting-  
56 related declines in forest elephants in central Africa up to 60 km from roads <sup>63</sup> and the extensive  
57 declines in large-bodied quarry species in remote areas in many regions modelled by Benitez-  
58 Lopez *et al.* <sup>78</sup>.

59  
60 **Text S5. Limitations in data: example with infrastructure data in British Columbia, Canada**

61  
62 OpenStreetMap (OSM) represents the most detailed publicly available relevant global dataset but  
63 is nonetheless noted to be incomplete, even for one of the most heavily used categories of  
64 infrastructure, paved roads <sup>48</sup>. No global assessment is available for the completeness of other  
65 categories in the dataset. One of the key categories for forest integrity, unpaved roads used for



56 resource extraction, has been shown to be incomplete over much of insular South-east Asia<sup>49</sup>. In  
57 Canada, for example, roads and other linear corridors used to explore, access and extract natural  
58 resources (e.g., logging, oil and gas, and minerals) are sometimes missing. Government data for  
59 the province of British Columbia (available at [https://catalogue.data.gov.bc.ca/dataset/digital-](https://catalogue.data.gov.bc.ca/dataset/digital-road-atlas-dra-master-partially-attributed-roads)  
60 [road-atlas-dra-master-partially-attributed-roads](https://catalogue.data.gov.bc.ca/dataset/digital-road-atlas-dra-master-partially-attributed-roads)) demonstrates, for example, the larger extent and  
61 density of regional roads as compared to OSM (Fig S1).

72

### 73 **Text S6. Classification of Forest Landscape Integrity Index scores**

74

75 In this paper, three illustrative classes were defined, mapped and summarized to give an overview  
76 of broad patterns of degradation in the world's forests. Three categories were defined as set out in  
77 the Materials and Methods. To determine the approximate levels of the FLII associated with these  
78 three categories, benchmark locations were selected in sites that could unambiguously be assigned  
79 to one of the categories using the authors' personal knowledge. At each site a single example  
80 pixel was selected within a part of the area with relatively uniform scores. The sample points are  
81 summarized in Table S4; they are widely spread across the world to ensure that the results are not  
82 only applicable to a limited region. The scores at these points suggest the following category  
83 boundaries:

84

- 85 • High FLII – 9.6-10
- 86 • Medium FLII – 6-9.6
- 87 • Low FLII – 0-6

88

89

90

91 **Table S1.** The datasets used to develop the Forest Ecosystem Integrity Index. The factor column  
 92 indicates the component of the index the dataset was used in.  
 93  
 94

| <b>Dataset</b>                                                           | <b>Factor</b>                                                | <b>Sources</b>                                                                                                                                                                                                                                                                                    |
|--------------------------------------------------------------------------|--------------------------------------------------------------|---------------------------------------------------------------------------------------------------------------------------------------------------------------------------------------------------------------------------------------------------------------------------------------------------|
| <b><i>Tree cover and tree cover loss</i></b>                             | Forest extent, connectivity, observed and inferred pressures | Global Forest Cover datasets; Hansen <i>et al.</i> <sup>22</sup> ; updates to 2018 available on-line from: <a href="http://earthenginepartners.appspot.com/science-2013-global-forest">http://earthenginepartners.appspot.com/science-2013-global-forest</a> .                                    |
| <b><i>Major tree cover loss driver</i></b>                               | Forest extent, observed and inferred pressures, connectivity | Curtis <i>et al.</i> <sup>23</sup>                                                                                                                                                                                                                                                                |
| <b><i>Landover and ocean extent</i></b>                                  | Forest extent                                                | Lamarche <i>et al.</i> <sup>79</sup>                                                                                                                                                                                                                                                              |
| <b><i>Potential forest cover</i></b>                                     | Connectivity                                                 | Laestadius <i>et al.</i> <sup>35</sup>                                                                                                                                                                                                                                                            |
| <b><i>Natural non-forest areas within extent of potential forest</i></b> | Connectivity                                                 | ESA-CCI Land Cover dataset; ESA <sup>68</sup>                                                                                                                                                                                                                                                     |
| <b><i>Infrastructure</i></b>                                             | Observed and inferred pressures                              | Open Street Map (selected elements) as of 2018; OpenStreetMap contributors <sup>73</sup>                                                                                                                                                                                                          |
| <b><i>Cropland</i></b>                                                   | Observed and inferred pressures                              | GFSAD 2015 Cropland Extent; Gumma <i>et al.</i> <sup>80</sup> , Massey <i>et al.</i> <sup>81</sup> , Oliphant <i>et al.</i> <sup>82</sup> , Phalke <i>et al.</i> <sup>83</sup> , Teluguntla <i>et al.</i> <sup>84</sup> , Xiong <i>et al.</i> <sup>85</sup> and Zhong <i>et al.</i> <sup>86</sup> |
| <b><i>Cropping intensity (irrigation)</i></b>                            | Observed and inferred pressures                              | GFSAD 2010 Cropland Mask; Teluguntla <i>et al.</i> <sup>74</sup>                                                                                                                                                                                                                                  |
| <b><i>Water surface</i></b>                                              | Observed and inferred pressures                              | JRC Global Surface Water Occurrence (all classes with >75% occurrence); Pekel <i>et al.</i> <sup>87</sup>                                                                                                                                                                                         |

95

96

97 **Table S2.** Classes in ESA-CCI dataset excluded from our potential forest cover layer because  
98 they overlap extensively with potential forest cover mapped by Laestadius *et al.*<sup>35</sup> but contain  
99 significant areas of natural non forest  
10  
11

| <b>Legend code</b> | <b>Class name</b>                                               |
|--------------------|-----------------------------------------------------------------|
| <b>60</b>          | Treecover, broadleaved, deciduous, closed to open, >15%         |
| <b>100</b>         | Mosaic tree and shrub (>50%]/ Herbaceous cover (<50%)           |
| <b>120</b>         | Shrubland                                                       |
| <b>121</b>         | Evergreen shrubland                                             |
| <b>122</b>         | Deciduous shrubland                                             |
| <b>130</b>         | Grassland                                                       |
| <b>140</b>         | Lichens and mosses                                              |
| <b>150</b>         | Sparse vegetation (tree, shrub, herbaceous cover) (<15%)        |
| <b>152</b>         | Sparse shrub (<15%)                                             |
| <b>180</b>         | Shrub or herbaceous cover, flooded, fresh/saline/brackish water |
| <b>200</b>         | Bare areas                                                      |
| <b>201</b>         | Consolidated bare areas                                         |
| <b>202</b>         | Unconsolidated bare areas                                       |
| <b>220</b>         | Permanent snow and ice                                          |

102

103

04 **Table S3.** Weightings used for Open Street Map (OSM) to combine into the Infrastructure data  
 05 layer.  
 06  
 07

| OSM Category                                                | OSM Subcategory                                                                                                                                  | Weighting applied for FPI         |    |
|-------------------------------------------------------------|--------------------------------------------------------------------------------------------------------------------------------------------------|-----------------------------------|----|
| <b>Aeroway</b>                                              | Apron / Helipad / Runway / Taxiway                                                                                                               | 8                                 |    |
|                                                             | Hangar / Terminal                                                                                                                                | 4                                 |    |
|                                                             | Aerodrome / Heliport / Spaceport                                                                                                                 | 3                                 |    |
| <b>Amenity / Landuse / Man-made object</b>                  | Fuel station / Gasometer / Petroleum well / Pipeline / Adit / Mineshaft / Quarry / Landfill / Sanitary dump station / Wastewater plant           | 15                                |    |
|                                                             | Chimney                                                                                                                                          | 10                                |    |
|                                                             | Industrial                                                                                                                                       | 8                                 |    |
|                                                             | Basin / Covered Reservoir / Pumping station / Water tower / Water well / Water works / Watermill                                                 | 7                                 |    |
|                                                             | Silo / Storage tank / Works                                                                                                                      | 6                                 |    |
|                                                             | Aerialway / Beacon / Lighthouse / Breakwater / Dyke / Embankment / Groyne / Pier / Communications tower / Mast / Observatory / Tower / Telescope | 5                                 |    |
|                                                             | Salt pond                                                                                                                                        | 4                                 |    |
|                                                             | Alpine hut / Beach resort / Camp site / Cemetery / Golf course / Marina / Pitch / Village green / Wilderness hut                                 | 3                                 |    |
|                                                             | <b>Barrier</b>                                                                                                                                   | City wall / Retaining wall / Wall | 5  |
|                                                             |                                                                                                                                                  | Ditch / Snow fence / Snow net     | 3  |
| Hedge                                                       |                                                                                                                                                  | 2                                 |    |
| <b>Road</b>                                                 | Motorway / Motorway link / Raceway                                                                                                               | 15                                |    |
|                                                             | Trunk / Trunk link                                                                                                                               | 11                                |    |
|                                                             | Primary / Primary link                                                                                                                           | 9                                 |    |
|                                                             | Secondary / Secondary link                                                                                                                       | 7                                 |    |
|                                                             | Tertiary / Tertiary link                                                                                                                         | 6                                 |    |
|                                                             | Bus guideway / Service                                                                                                                           | 5                                 |    |
|                                                             | Living street / Mini roundabout / Residential / Turning circle / Unclassified / Unknown/ Elevator / Rest area                                    | 4                                 |    |
|                                                             | Escape / Track                                                                                                                                   | 3                                 |    |
|                                                             | Bridleway / Cycleway/ Footway / Path / Pedestrian / Steps                                                                                        | 2                                 |    |
|                                                             | <b>Military</b>                                                                                                                                  | Nuclear explosion site            | 30 |
| Danger area / Range / Trench                                |                                                                                                                                                  | 15                                |    |
| Ammunition / Barracks / Bunker / Checkpoint                 |                                                                                                                                                  | 7                                 |    |
| Airfield / Military-owned land / Naval base / Training area |                                                                                                                                                  | 3                                 |    |
| <b>Power</b>                                                | Plant/generator - coal                                                                                                                           | 20                                |    |
|                                                             | Plant/generator - oil                                                                                                                            | 15                                |    |
|                                                             | Plant/generator – gas/ Plant/generator - bio / waste                                                                                             | 10                                |    |
|                                                             | Plant/generator – hydro; nuclear; other / Line, Substation                                                                                       | 7                                 |    |
|                                                             | Plant/generator - solar / Heliostat / wind / Windmill                                                                                            | 5                                 |    |
|                                                             | Cable                                                                                                                                            | 3                                 |    |
| <b>Railway</b>                                              | Funicular / Preserved / Rail / Monorail / Subway                                                                                                 | 10                                |    |
|                                                             | Light rail / Miniature / Narrow gauge/ Tram                                                                                                      | 7                                 |    |
|                                                             | Station                                                                                                                                          | 5                                 |    |
|                                                             | Halt / Platform                                                                                                                                  | 4                                 |    |
|                                                             | Abandoned / Disused                                                                                                                              | 2                                 |    |
| <b>Waterway</b>                                             | Dam / Lock gate                                                                                                                                  | 20                                |    |
|                                                             | Canal                                                                                                                                            | 13                                |    |
|                                                             | Ditch/ Drain / Weir                                                                                                                              | 3                                 |    |

08

09

10 **Table S4.** Points assessed to determine category boundaries for classifying the FHI into high,  
 11 medium and low classes.  
 12  
 13

| Category | Code | Point description                                     | Country       | Point Score |
|----------|------|-------------------------------------------------------|---------------|-------------|
| High     | 103  | Interior of Lopé National Park                        | Gabon         | 10.000      |
| High     | 106  | Interior of Tai National Park                         | Cote d'Ivoire | 10.000      |
| High     | 108  | Interior of Pacaya-Samiria National Reserve           | Peru          | 10.000      |
| High     | 109  | Interior of Central Suriname Nature Reserve           | Suriname      | 10.000      |
| High     | 116  | Interior of Liard River area                          | Canada        | 10.000      |
| High     | 101  | Interior of Okapi Faunal Reserve                      | DRC           | 9.997       |
| High     | 104  | Interior of Nyungwe National Park                     | Rwanda        | 9.992       |
| High     | 111  | Interior of Rio Platano Biosphere Reserve             | Honduras      | 9.990       |
| High     | 102  | Interior of Odzala National Park                      | RoC           | 9.974       |
| High     | 117  | Interior of Wells Gray Provincial Park                | Canada        | 9.972       |
| High     | 119  | Interior of Øvre Pasvik National Park                 | Norway        | 9.944       |
| High     | 115  | Interior of Tasmania Wilderness World Heritage Area   | Australia     | 9.918       |
| High     | 107  | Interior of Marojejy National Park                    | Madagascar    | 9.910       |
| High     | 112  | Interior of Khao Yai National Park                    | Thailand      | 9.908       |
| High     | 105  | Interior of Niassa Special Reserve                    | Mozambique    | 9.819       |
| High     | 110  | Interior of Maya Biosphere Reserve                    | Guatemala     | 9.798       |
| High     | 114  | Interior of Batang Ai National Park                   | Malaysia      | 9.756       |
| High     | 118  | Interior of Quetico Provincial Park                   | Canada        | 9.750       |
| High     | 113  | Interior of Sundarbans National Park                  | Bangladesh    | 9.606       |
| Medium   | 215  | Interior of Bialowieza National Park                  | Poland        | 9.086       |
| Medium   | 208  | Interior of Mabira Central Forest Reserve             | Uganda        | 9.067       |
| Medium   | 211  | Area of selective logging                             | Gabon         | 8.840       |
| Medium   | 219  | Near main tourism corridor, Mt Myohyang National Park | DPR Korea     | 8.762       |
| Medium   | 203  | Interior of Phnom Kulen Wildlife Sanctuary            | Cambodia      | 8.710       |
| Medium   | 210  | Area of selective logging                             | Guyana        | 8.364       |
| Medium   | 202  | Interior of Dong Hua Sao National Protected Area      | Lao PDR       | 8.078       |
| Medium   | 212  | Area of selective logging                             | DRC           | 7.981       |
| Medium   | 206  | Interior of Manga Forest Reserve                      | Tanzania      | 7.960       |
| Medium   | 207  | Near margin of Nyungwe National Park                  | Rwanda        | 7.938       |
| Medium   | 204  | South part of Nagarhole National Park                 | India         | 7.759       |
| Medium   | 213  | Area of selective logging                             | Cameroon      | 7.379       |
| Medium   | 201  | Tat Leuk, Phou Khaokhoay National Protected Area      | Lao PDR       | 7.251       |
| Medium   | 216  | Interior of Loch Garten Nature Reserve                | UK            | 7.146       |
| Medium   | 209  | Area of selective logging                             | Congo         | 6.734       |
| Medium   | 217  | Tourism area, Lamington National Park                 | Australia     | 6.729       |
| Medium   | 214  | Lowlands of Guanacaste National Park                  | Costa Rica    | 6.719       |
| Medium   | 218  | Near margin of Sepilok Forest Reserve                 | Malaysia      | 6.353       |
| Medium   | 205  | Interior of Similajau National Park                   | Malaysia      | 6.130       |
| Low      | 305  | Dong Nathat                                           | Lao PDR       | 5.638       |
| Low      | 317  | Foothills of Mt Makiling                              | Philippines   | 5.395       |
| Low      | 310  | Suburban woodlot, Dobbs Ferry                         | USA           | 4.710       |
| Low      | 309  | Jozani Forest Reserve                                 | Tanzania      | 4.680       |
| Low      | 316  | Foothills of Mt Canlaon                               | Philippines   | 4.597       |

|            |     |                                       |          |       |
|------------|-----|---------------------------------------|----------|-------|
| <b>Low</b> | 320 | Forest fragment near Paramaribo       | Suriname | 4.566 |
| <b>Low</b> | 302 | Central Park, New York                | USA      | 3.575 |
| <b>Low</b> | 301 | Bagley Wood, Oxford                   | UK       | 3.525 |
| <b>Low</b> | 307 | Boeng Yeak Lom Protected Area         | Cambodia | 3.323 |
| <b>Low</b> | 304 | Angkor Thom                           | Cambodia | 3.122 |
| <b>Low</b> | 315 | Forest in rural complex, Mambasa area | DRC      | 2.689 |
| <b>Low</b> | 312 | Woodland in Beaumont area             | USA      | 2.581 |
| <b>Low</b> | 318 | Swidden near Andoung Kraloeng village | Cambodia | 2.304 |
| <b>Low</b> | 319 | Forest mosaic near Kaev Seima village | Cambodia | 2.187 |
| <b>Low</b> | 303 | Thetford Forest                       | UK       | 2.082 |
| <b>Low</b> | 313 | Woodland in Augusta area              | USA      | 0.686 |
| <b>Low</b> | 314 | Woodland in Emporia area              | USA      | 0.589 |
| <b>Low</b> | 311 | River Park, Chicago                   | USA      | 0.566 |
| <b>Low</b> | 306 | Houei Nhang Forest Reserve            | Lao PDR  | 0.000 |
| <b>Low</b> | 308 | Pugu Forest Reserve                   | Tanzania | 0.000 |

14

15

16 **Table S5.** Mean Forest Landscape Integrity Index scores and areas for forest integrity categories  
 17 by country.

18

| Country                         | Mean FLII | Low integrity (km <sup>2</sup> ) | Medium integrity (km <sup>2</sup> ) | High integrity (km <sup>2</sup> ) | Total forest area (km <sup>2</sup> ) |
|---------------------------------|-----------|----------------------------------|-------------------------------------|-----------------------------------|--------------------------------------|
| <b>Afghanistan</b>              | 8.85      | 111.06                           | 1805.58                             | 1196.73                           | 3113.37                              |
| <b>Albania</b>                  | 6.77      | 3237.21                          | 7026.39                             | 163.35                            | 10426.95                             |
| <b>Algeria</b>                  | 5.22      | 9259.92                          | 7531.20                             | 99.27                             | 16890.39                             |
| <b>Andorra</b>                  | 4.45      | 229.32                           | 67.68                               | 0.00                              | 297.00                               |
| <b>Angola</b>                   | 8.35      | 108197.91                        | 290844.45                           | 323760.87                         | 722803.23                            |
| <b>Antigua and Barbuda</b>      | 4.72      | 119.61                           | 97.56                               | 0.00                              | 217.17                               |
| <b>Argentina</b>                | 7.21      | 111224.79                        | 215792.01                           | 87866.01                          | 414882.81                            |
| <b>Armenia</b>                  | 5.46      | 2498.04                          | 2193.84                             | 3.96                              | 4695.84                              |
| <b>Australia</b>                | 7.22      | 144234.00                        | 285344.46                           | 119484.45                         | 549062.91                            |
| <b>Austria</b>                  | 3.55      | 54325.17                         | 18342.09                            | 31.05                             | 72698.31                             |
| <b>Azerbaijan</b>               | 6.55      | 6347.07                          | 9443.88                             | 2030.85                           | 17821.80                             |
| <b>Bahamas</b>                  | 7.35      | 833.40                           | 2203.83                             | 459.09                            | 3496.32                              |
| <b>Bangladesh</b>               | 5.45      | 10978.29                         | 7947.09                             | 2408.76                           | 21334.14                             |
| <b>Belarus</b>                  | 3.63      | 130730.13                        | 35230.14                            | 156.51                            | 166116.78                            |
| <b>Belgium</b>                  | 1.36      | 13773.69                         | 460.89                              | 0.00                              | 14234.58                             |
| <b>Belize</b>                   | 6.15      | 7359.93                          | 8386.02                             | 2930.67                           | 18676.62                             |
| <b>Benin</b>                    | 5.86      | 4808.07                          | 3775.05                             | 1800.99                           | 10384.11                             |
| <b>Bhutan</b>                   | 8.85      | 1831.05                          | 18972.99                            | 11465.10                          | 32269.14                             |
| <b>Bolivia</b>                  | 8.47      | 82523.97                         | 293482.08                           | 283959.81                         | 659965.86                            |
| <b>Bosnia and Herzegovina</b>   | 5.99      | 18702.00                         | 23575.86                            | 800.28                            | 43078.14                             |
| <b>Botswana</b>                 | 9.13      | 13.50                            | 197.64                              | 396.36                            | 607.50                               |
| <b>Brazil</b>                   | 7.52      | 1436919.93                       | 1397839.41                          | 2371950.81                        | 5206710.15                           |
| <b>Brunei Darussalam</b>        | 7.71      | 1121.94                          | 2852.55                             | 1484.55                           | 5459.04                              |
| <b>Bulgaria</b>                 | 6.09      | 25747.47                         | 35630.19                            | 1138.32                           | 62515.98                             |
| <b>Burundi</b>                  | 4.50      | 6940.98                          | 3869.55                             | 45.72                             | 10856.25                             |
| <b>Cabo Verde</b>               | 6.37      | 28.44                            | 39.51                               | 0.00                              | 67.95                                |
| <b>Cambodia</b>                 | 6.31      | 31219.02                         | 33111.90                            | 16912.17                          | 81243.09                             |
| <b>Cameroon</b>                 | 8.00      | 66885.66                         | 183345.03                           | 120519.72                         | 370750.41                            |
| <b>Canada</b>                   | 8.99      | 757333.89                        | 1665037.71                          | 5425523.73                        | 7847895.33                           |
| <b>Central African Republic</b> | 9.28      | 30544.38                         | 141167.79                           | 384162.12                         | 555874.29                            |
| <b>Chad</b>                     | 6.18      | 5346.09                          | 6106.32                             | 1921.32                           | 13373.73                             |
| <b>Chile</b>                    | 7.37      | 72883.71                         | 58430.97                            | 155976.66                         | 287291.34                            |
| <b>China</b>                    | 7.14      | 616917.24                        | 1183840.56                          | 428279.22                         | 2229037.02                           |
| <b>Colombia</b>                 | 8.26      | 152687.43                        | 276273.45                           | 432726.30                         | 861687.18                            |
| <b>Comoros</b>                  | 7.69      | 292.95                           | 1185.21                             | 84.06                             | 1562.22                              |
| <b>Congo</b>                    | 8.89      | 24640.65                         | 124894.35                           | 159425.82                         | 308960.82                            |

|                           |      |             |             |             |             |
|---------------------------|------|-------------|-------------|-------------|-------------|
| <b>Congo DRC</b>          | 7.56 | 538620.93   | 946469.97   | 735239.16   | 2220330.06  |
| <b>Costa Rica</b>         | 4.65 | 27763.02    | 13180.14    | 4256.28     | 45199.44    |
| <b>Cote d'Ivoire</b>      | 3.64 | 160151.13   | 41653.08    | 7391.79     | 209196.00   |
| <b>Croatia</b>            | 4.92 | 22590.90    | 15160.68    | 539.55      | 38291.13    |
| <b>Cuba</b>               | 5.40 | 24565.77    | 20003.76    | 1811.79     | 46381.32    |
| <b>Cyprus</b>             | 7.06 | 481.95      | 1255.50     | 21.42       | 1758.87     |
| <b>Czechia</b>            | 1.71 | 49709.88    | 2486.34     | 0.00        | 52196.22    |
| <b>Denmark</b>            | 0.50 | 10352.43    | 64.17       | 0.00        | 10416.60    |
| <b>Dominica</b>           | 1.06 | 591.75      | 2.79        | 0.00        | 594.54      |
| <b>Dominican Republic</b> | 4.19 | 21149.55    | 9961.02     | 551.34      | 31661.91    |
| <b>Ecuador</b>            | 7.66 | 49251.51    | 78506.55    | 74394.99    | 202153.05   |
| <b>Egypt</b>              | 0.56 | 5592.33     | 256.32      | 81.18       | 5929.83     |
| <b>El Salvador</b>        | 4.05 | 9124.29     | 3062.34     | 0.99        | 12187.62    |
| <b>Equatorial Guinea</b>  | 7.99 | 4019.58     | 17713.71    | 5039.19     | 26772.48    |
| <b>Estonia</b>            | 3.05 | 46906.92    | 9402.30     | 103.14      | 56412.36    |
| <b>Ethiopia</b>           | 7.16 | 53527.23    | 85895.28    | 45185.85    | 184608.36   |
| <b>Fiji</b>               | 8.35 | 1927.98     | 11744.55    | 4058.91     | 17731.44    |
| <b>Finland</b>            | 5.08 | 318983.85   | 203019.66   | 25287.84    | 547291.35   |
| <b>France</b>             | 4.52 | 10389752.64 | 15048176.67 | 23436533.52 | 48874462.83 |
| <b>Gabon</b>              | 9.07 | 11902.77    | 119341.17   | 121752.99   | 252996.93   |
| <b>Gambia</b>             | 4.56 | 186.12      | 86.49       | 0.36        | 272.97      |
| <b>Georgia</b>            | 7.79 | 9438.30     | 24075.18    | 13284.54    | 46798.02    |
| <b>Germany</b>            | 2.28 | 192510.09   | 17617.05    | 0.00        | 210127.14   |
| <b>Ghana</b>              | 4.53 | 58271.94    | 29285.91    | 2194.47     | 89752.32    |
| <b>Greece</b>             | 6.60 | 18874.71    | 36245.97    | 1440.45     | 56561.13    |
| <b>Grenada</b>            | 4.22 | 232.38      | 91.26       | 1.44        | 325.08      |
| <b>Guatemala</b>          | 3.85 | 61286.58    | 19636.20    | 5910.03     | 86832.81    |
| <b>Guinea</b>             | 4.90 | 83471.40    | 56188.71    | 3058.56     | 142718.67   |
| <b>Guinea-Bissau</b>      | 5.70 | 9599.49     | 9055.35     | 911.25      | 19566.09    |
| <b>Guyana</b>             | 9.58 | 4304.25     | 41380.47    | 148565.61   | 194250.33   |
| <b>Haiti</b>              | 4.01 | 7602.48     | 3032.91     | 13.59       | 10648.98    |
| <b>Honduras</b>           | 4.48 | 60292.08    | 24862.95    | 3861.09     | 89016.12    |
| <b>Hungary</b>            | 2.25 | 27551.70    | 3055.86     | 0.00        | 30607.56    |
| <b>India</b>              | 7.09 | 128431.98   | 280694.52   | 60265.89    | 469392.39   |
| <b>Indonesia</b>          | 6.60 | 545281.65   | 522602.73   | 437797.35   | 1505681.73  |
| <b>Iran</b>               | 7.67 | 4207.41     | 16193.16    | 2710.26     | 23110.83    |
| <b>Iraq</b>               | 3.59 | 128.79      | 10.98       | 0.00        | 139.77      |
| <b>Ireland</b>            | 0.92 | 8752.95     | 160.92      | 0.00        | 8913.87     |
| <b>Israel</b>             | 4.14 | 204.75      | 101.52      | 0.00        | 306.27      |
| <b>Italy</b>              | 3.65 | 108803.25   | 37366.47    | 34.02       | 146203.74   |
| <b>Jamaica</b>            | 5.01 | 5681.70     | 3445.92     | 167.22      | 9294.84     |
| <b>Japan</b>              | 5.80 | 170329.86   | 169714.08   | 17655.48    | 357699.42   |
| <b>Jordan</b>             | 2.79 | 14.49       | 0.00        | 0.00        | 14.49       |



|                         |      |           |           |           |           |
|-------------------------|------|-----------|-----------|-----------|-----------|
| <b>Kazakhstan</b>       | 8.23 | 9668.70   | 29090.52  | 23105.88  | 61865.10  |
| <b>Kenya</b>            | 4.20 | 28634.85  | 13695.39  | 4769.10   | 47099.34  |
| <b>Kyrgyzstan</b>       | 8.86 | 447.12    | 3799.53   | 3696.12   | 7942.77   |
| <b>Laos</b>             | 5.59 | 98929.80  | 85493.97  | 20386.08  | 204809.85 |
| <b>Latvia</b>           | 2.09 | 69714.27  | 3956.94   | 0.00      | 73671.21  |
| <b>Lebanon</b>          | 3.76 | 656.10    | 138.96    | 0.00      | 795.06    |
| <b>Lesotho</b>          | 7.40 | 1.26      | 4.68      | 0.00      | 5.94      |
| <b>Liberia</b>          | 4.79 | 52735.32  | 31575.78  | 11164.77  | 95475.87  |
| <b>Libya</b>            | 4.85 | 17.64     | 2.16      | 0.00      | 19.80     |
| <b>Liechtenstein</b>    | 4.50 | 86.49     | 61.83     | 0.00      | 148.32    |
| <b>Lithuania</b>        | 1.62 | 43005.87  | 1618.02   | 0.00      | 44623.89  |
| <b>Luxembourg</b>       | 1.12 | 1808.28   | 0.00      | 0.00      | 1808.28   |
| <b>Macedonia</b>        | 7.42 | 2725.56   | 9427.50   | 611.91    | 12764.97  |
| <b>Madagascar</b>       | 4.63 | 127788.57 | 70740.54  | 12641.94  | 211171.05 |
| <b>Malawi</b>           | 5.74 | 12955.41  | 12547.98  | 2463.12   | 27966.51  |
| <b>Malaysia</b>         | 5.01 | 132119.64 | 93287.70  | 23173.20  | 248580.54 |
| <b>Maldives</b>         | 5.33 | 1.53      | 2.61      | 0.00      | 4.14      |
| <b>Mali</b>             | 7.16 | 460.26    | 1023.84   | 143.55    | 1627.65   |
| <b>Mauritius</b>        | 5.46 | 610.47    | 516.33    | 0.00      | 1126.80   |
| <b>Mexico</b>           | 6.82 | 206323.11 | 302065.38 | 133944.39 | 642332.88 |
| <b>Micronesia</b>       | 7.55 | 10.44     | 57.78     | 2.43      | 70.65     |
| <b>Moldova</b>          | 2.20 | 4581.63   | 295.83    | 0.00      | 4877.46   |
| <b>Mongolia</b>         | 9.36 | 788.94    | 18346.68  | 42134.13  | 61269.75  |
| <b>Montenegro</b>       | 6.41 | 4021.20   | 6498.63   | 110.07    | 10629.90  |
| <b>Morocco</b>          | 6.74 | 2754.45   | 4934.43   | 542.70    | 8231.58   |
| <b>Mozambique</b>       | 6.93 | 158568.57 | 199312.20 | 120282.75 | 478163.52 |
| <b>Myanmar</b>          | 7.18 | 140223.78 | 239440.77 | 105996.69 | 485661.24 |
| <b>Namibia</b>          | 8.43 | 5.76      | 15.66     | 17.91     | 39.33     |
| <b>Nepal</b>            | 7.23 | 15633.90  | 47852.91  | 4292.01   | 67778.82  |
| <b>Netherlands</b>      | 0.60 | 8510.58   | 105.57    | 0.00      | 8616.15   |
| <b>New Zealand</b>      | 7.12 | 45310.59  | 59378.76  | 49047.84  | 153737.19 |
| <b>Nicaragua</b>        | 3.63 | 67465.35  | 18267.03  | 5038.02   | 90770.40  |
| <b>Nigeria</b>          | 6.20 | 65466.18  | 66157.20  | 24612.03  | 156235.41 |
| <b>North Korea</b>      | 8.02 | 11023.56  | 52964.73  | 11127.87  | 75116.16  |
| <b>Norway</b>           | 6.98 | 83005.02  | 151888.32 | 42608.70  | 277502.04 |
| <b>Pakistan</b>         | 7.42 | 2526.84   | 9588.87   | 1394.64   | 13510.35  |
| <b>Palau</b>            | 8.09 | 46.62     | 346.68    | 9.63      | 402.93    |
| <b>Panama</b>           | 6.37 | 25908.21  | 22010.58  | 15083.55  | 63002.34  |
| <b>Papua New Guinea</b> | 8.84 | 38120.13  | 187115.94 | 220457.88 | 445693.95 |
| <b>Paraguay</b>         | 6.39 | 86292.27  | 111883.50 | 33028.20  | 231203.97 |
| <b>Peru</b>             | 8.86 | 87361.11  | 193986.45 | 517323.60 | 798671.16 |
| <b>Philippines</b>      | 5.91 | 96097.50  | 106269.84 | 9013.05   | 211380.39 |
| <b>Poland</b>           | 2.24 | 165950.64 | 11333.16  | 0.00      | 177283.80 |

|                                         |       |            |            |             |             |
|-----------------------------------------|-------|------------|------------|-------------|-------------|
| <b>Portugal</b>                         | 8.82  | 34239.15   | 768.69     | 0.00        | 35007.84    |
| <b>Romania</b>                          | 5.95  | 55364.31   | 69757.65   | 860.04      | 125982.00   |
| <b>Russian Federation</b>               | 9.02  | 1351531.17 | 4230704.43 | 10390434.30 | 15972669.90 |
| <b>Rwanda</b>                           | 3.85  | 5714.91    | 2214.27    | 627.21      | 8556.39     |
| <b>Saint Kitts and Nevis</b>            | 4.55  | 101.07     | 53.10      | 0.00        | 154.17      |
| <b>Saint Lucia</b>                      | 6.17  | 244.44     | 329.22     | 0.00        | 573.66      |
| <b>Saint Vincent and the Grenadines</b> | 6.95  | 109.89     | 232.11     | 0.00        | 342.00      |
| <b>San Marino</b>                       | 0.01  | 9.45       | 0.00       | 0.00        | 9.45        |
| <b>Sao Tome and Principe</b>            | 6.64  | 31.50      | 141.93     | 0.00        | 173.43      |
| <b>Senegal</b>                          | 7.11  | 858.51     | 2529.90    | 166.68      | 3555.09     |
| <b>Serbia</b>                           | 5.29  | 27890.73   | 21965.76   | 778.32      | 50634.81    |
| <b>Seychelles</b>                       | 10.00 | 0.00       | 0.00       | 78.39       | 78.39       |
| <b>Sierra Leone</b>                     | 2.76  | 53423.73   | 12096.45   | 670.05      | 66190.23    |
| <b>Singapore</b>                        | 1.11  | 172.98     | 2.16       | 0.00        | 175.14      |
| <b>Slovakia</b>                         | 4.34  | 26753.76   | 12414.96   | 0.00        | 39168.72    |
| <b>Slovenia</b>                         | 3.78  | 15942.42   | 5424.48    | 0.00        | 21366.90    |
| <b>Solomon Islands</b>                  | 7.19  | 7316.10    | 16504.20   | 3497.31     | 27317.61    |
| <b>Somalia</b>                          | 7.16  | 347.85     | 1390.32    | 47.25       | 1785.42     |
| <b>South Africa</b>                     | 4.94  | 52634.34   | 40570.02   | 3678.75     | 96883.11    |
| <b>South Korea</b>                      | 6.02  | 31312.08   | 40391.91   | 1152.45     | 72856.44    |
| <b>South Sudan</b>                      | 9.45  | 5119.83    | 59602.77   | 145246.86   | 209969.46   |
| <b>Spain</b>                            | 4.23  | 110666.25  | 61013.70   | 174.51      | 171854.46   |
| <b>Sri Lanka</b>                        | 5.83  | 20865.78   | 22739.76   | 1637.37     | 45242.91    |
| <b>Sudan</b>                            | 9.80  | 3.33       | 468.09     | 3383.73     | 3855.15     |
| <b>Suriname</b>                         | 9.39  | 6865.74    | 25298.37   | 108694.26   | 140858.37   |
| <b>Swaziland</b>                        | 4.21  | 5665.77    | 2820.69    | 15.21       | 8501.67     |
| <b>Sweden</b>                           | 5.35  | 357516.90  | 250928.64  | 58454.01    | 666899.55   |
| <b>Switzerland</b>                      | 3.53  | 19952.01   | 6415.38    | 14.04       | 26381.43    |
| <b>Syria</b>                            | 3.64  | 1039.68    | 348.21     | 0.00        | 1387.89     |
| <b>Tajikistan</b>                       | 8.65  | 44.01      | 177.84     | 168.30      | 390.15      |
| <b>Tanzania</b>                         | 7.13  | 125997.30  | 162371.97  | 124836.39   | 413205.66   |
| <b>Thailand</b>                         | 6.00  | 89501.49   | 94098.42   | 35254.08    | 218853.99   |
| <b>Timor-Leste</b>                      | 7.11  | 1791.81    | 7093.62    | 55.89       | 8941.32     |
| <b>Togo</b>                             | 5.88  | 5142.42    | 4600.35    | 1093.86     | 10836.63    |
| <b>Trinidad and Tobago</b>              | 6.62  | 1520.01    | 2256.66    | 431.64      | 4208.31     |
| <b>Tunisia</b>                          | 5.14  | 1690.11    | 1233.36    | 2.61        | 2926.08     |
| <b>Turkey</b>                           | 6.39  | 56223.81   | 89560.17   | 4627.62     | 150411.60   |
| <b>Turkmenistan</b>                     | 6.31  | 5.76       | 41.67      | 0.00        | 47.43       |
| <b>Uganda</b>                           | 4.36  | 77922.09   | 36665.64   | 7558.29     | 122146.02   |
| <b>Ukraine</b>                          | 3.30  | 139402.08  | 30859.11   | 274.59      | 170535.78   |
| <b>United Kingdom</b>                   | 1.65  | 49948.56   | 5249.61    | 68.04       | 55266.21    |
| <b>United States</b>                    | 6.65  | 1696283.64 | 1555466.22 | 1329637.50  | 4581387.36  |

|                   |      |          |           |           |           |
|-------------------|------|----------|-----------|-----------|-----------|
| <b>Uruguay</b>    | 3.61 | 14079.42 | 4735.89   | 0.00      | 18815.31  |
| <b>Uzbekistan</b> | 6.77 | 288.90   | 301.32    | 269.46    | 859.68    |
| <b>Vanuatu</b>    | 8.82 | 977.04   | 6376.32   | 4942.53   | 12295.89  |
| <b>Venezuela</b>  | 8.78 | 65812.77 | 173850.84 | 355617.09 | 595280.70 |
| <b>Vietnam</b>    | 5.35 | 87315.75 | 80364.24  | 10073.88  | 177753.87 |
| <b>Zambia</b>     | 7.50 | 99898.65 | 169435.53 | 114448.50 | 383782.68 |
| <b>Zimbabwe</b>   | 6.31 | 10032.21 | 15273.45  | 1735.92   | 27041.58  |

19

20 **Table S6.** Mean Forest Landscape Integrity Index scores for provinces of Democratic Republic of  
 21 Congo (DRC), Indonesia and Canada.

22

| <b>DRC</b>          |                 | <b>Indonesia</b>           |                 | <b>Canada</b>                    |                 |
|---------------------|-----------------|----------------------------|-----------------|----------------------------------|-----------------|
| <b>Province</b>     | <b>Mean FHI</b> | <b>Province</b>            | <b>Mean FHI</b> | <b>Province</b>                  | <b>Mean FHI</b> |
| <b>Lualaba</b>      | 8.57            | <b>Papua</b>               | 9.34            | <b>Northwest Territories</b>     | 9.90            |
| <b>Tshuapa</b>      | 8.55            | <b>West Papua</b>          | 9.00            | <b>Yukon</b>                     | 9.86            |
| <b>Tshopo</b>       | 8.39            | <b>Kalimantan Utara</b>    | 8.52            | <b>Newfoundland and Labrador</b> | 9.66            |
| <b>Bas-Uélé</b>     | 8.38            | <b>Maluku</b>              | 8.03            | <b>Nunavut</b>                   | 9.65            |
| <b>Équateur</b>     | 8.37            | <b>Maluku Utara</b>        | 7.41            | <b>Manitoba</b>                  | 9.58            |
| <b>Haut-Lomami</b>  | 8.29            | <b>Nusa Tenggara Barat</b> | 6.86            | <b>Saskatchewan</b>              | 9.40            |
| <b>Tanganyika</b>   | 8.24            | <b>Aceh</b>                | 6.83            | <b>Ontario</b>                   | 8.94            |
| <b>Nord-Ubangi</b>  | 8.19            | <b>Nusa Tenggara Timur</b> | 6.80            | <b>Québec</b>                    | 8.80            |
| <b>Haut-Katanga</b> | 8.05            | <b>Gorontalo</b>           | 6.60            | <b>Alberta</b>                   | 8.46            |
| <b>Kwango</b>       | 7.83            | <b>Sulawesi Utara</b>      | 6.58            | <b>British Columbia</b>          | 8.22            |
| <b>Mai-Ndombe</b>   | 7.58            | <b>Sulawesi Tengah</b>     | 6.54            | <b>Nova Scotia</b>               | 6.07            |
| <b>Haut-Uélé</b>    | 7.46            | <b>Kalimantan Timur</b>    | 6.42            | <b>New Brunswick</b>             | 5.15            |
| <b>Maniema</b>      | 7.44            | <b>Sulawesi Barat</b>      | 6.31            | <b>Prince Edward Island</b>      | 2.74            |
| <b>Sankuru</b>      | 7.34            | <b>Sumatera Barat</b>      | 6.20            |                                  |                 |
| <b>Lomami</b>       | 7.20            | <b>Sulawesi Tenggara</b>   | 5.99            |                                  |                 |
| <b>Kasaï</b>        | 7.11            | <b>Kalimantan Tengah</b>   | 5.84            |                                  |                 |
| <b>Ituri</b>        | 6.70            | <b>Sulawesi Selatan</b>    | 5.63            |                                  |                 |
| <b>Mongala</b>      | 6.23            | <b>Banten</b>              | 4.97            |                                  |                 |

|                       |      |                           |      |
|-----------------------|------|---------------------------|------|
| <b>Nord-Kivu</b>      | 6.22 | <b>Bengkulu</b>           | 4.94 |
| <b>Sud-Kivu</b>       | 6.20 | <b>Sumatera Utara</b>     | 4.89 |
| <b>Kasai-Central</b>  | 5.95 | <b>Kalimantan Barat</b>   | 4.87 |
| <b>Sud-Ubangi</b>     | 5.93 | <b>Kepulauan Riau</b>     | 4.86 |
| <b>Kwilu</b>          | 5.65 | <b>Jawa Barat</b>         | 4.76 |
| <b>Kinshasa</b>       | 4.75 | <b>Lampung</b>            | 4.73 |
| <b>Kasai-Oriental</b> | 4.13 | <b>Jawa Tengah</b>        | 4.59 |
| <b>Kongo-Central</b>  | 3.95 | <b>Bali</b>               | 4.43 |
|                       |      | <b>Jawa Timur</b>         | 4.40 |
|                       |      | <b>Jambi</b>              | 4.01 |
|                       |      | <b>Riau</b>               | 3.92 |
|                       |      | <b>Kalimantan Selatan</b> | 3.24 |
|                       |      | <b>Sumatera Selatan</b>   | 2.86 |
|                       |      | <b>Yogyakarta</b>         | 2.83 |

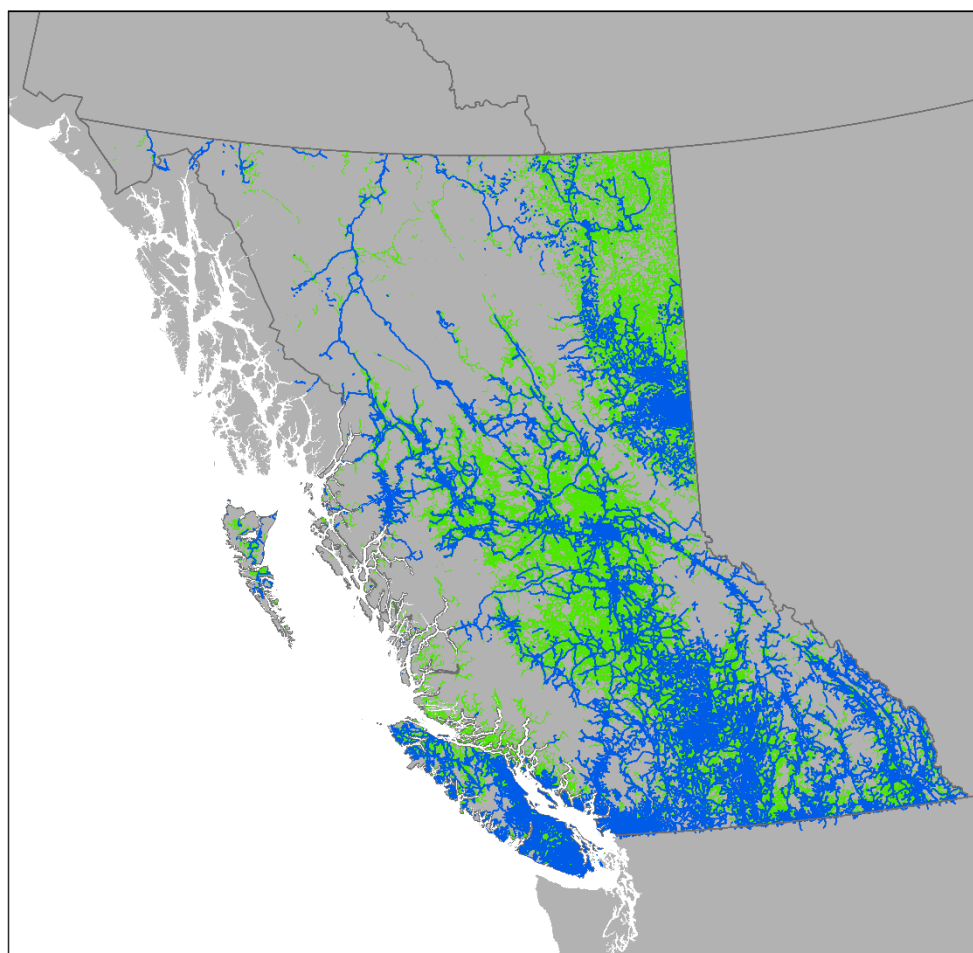

— Open Street Map  
— Provincial Digital Road Atlas  
(British Columbia)

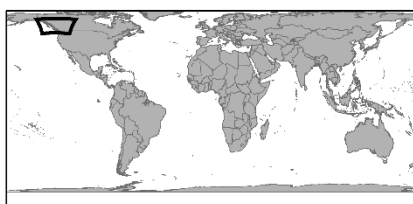

24  
25

26 **Figure S1.** A map overlaying the Open Street Maps data (blue) and provincial government data  
27 (green) for roads and other linear infrastructure associated with resource access.

28

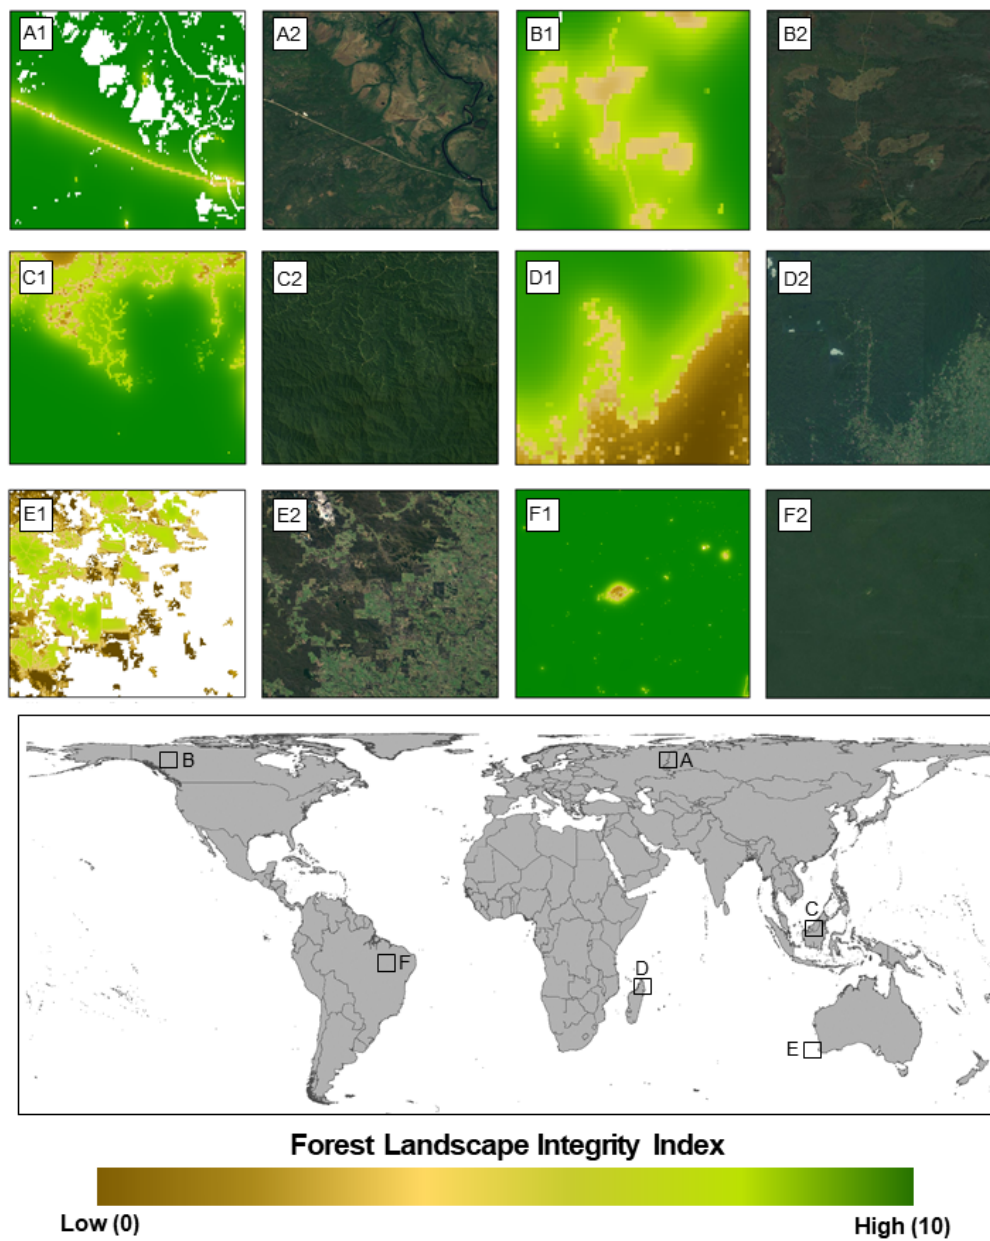

29

30

31 **Figure S2.** A global map of Forest Landscape Integrity for 2019. Highlighted regions show **A.** A

32 remote road in Russia, **B.** Clearcut logging in Canada, **C.** Selective logging in Borneo, **D.**

33 Swidden agriculture in Madagascar, **E.** Forest fragmentation in Western Australia, **F.** Remote

34 settlements in the Brazilian Amazon.

35

## 36 References

- 37  
38  
39 1 Hansen, M. C. *et al.* High-Resolution Global Maps of 21st-Century Forest Cover Change. *Science* **342**, 850-853, doi:10.1126/science.1244693 (2013).
- 40  
41 2 Gibson, L. *et al.* Primary forests are irreplaceable for sustaining tropical biodiversity. *Nature* **478**, 378-381 (2011).
- 42  
43 3 Curtis, P. G., Slay, C. M., Harris, N. L., Tyukavina, A. & Hansen, M. C. Classifying  
44 drivers of global forest loss. *Science* **361**, 1108-1111, doi:10.1126/science.aau3445  
45 (2018).
- 46 4 Laestadius, L. *et al.* Opportunities for forest landscape restoration. *Unasylva* **62**, 238  
47 (2011).
- 48 5 ESA. Land Cover CCI Product User Guide Version 2. Tech. Rep., (2017).
- 49 6 Theobald, D. M. A general model to quantify ecological integrity for landscape  
50 assessments and US application. *Landscape Ecol.* **28**, 1859-1874 (2013).
- 51 7 Sanderson, E. W. *et al.* The human footprint and the last of the wild. *Bioscience* **52**, 891-  
52 904 (2002).
- 53 8 Venter, O. *et al.* Sixteen years of change in the global terrestrial human footprint and  
54 implications for biodiversity conservation. *Nature Communications* **7**, 12558 (2016).
- 55 9 Kennedy, C. M., Oakleaf, J. R., Theobald, D. M., Baruch-Mordo, S. & Kiesecker, J.  
56 Managing the middle: A shift in conservation priorities based on the global human  
57 modification gradient. *Global Change Biol.* **25**, 811-826 (2019).
- 58 10 Thompson, I. D. *et al.* An Operational Framework for Defining and Monitoring Forest  
59 Degradation. *Ecology and Society* **18** (2013).
- 60 11 Contributors. (ed OpenStreetMap) (2015).
- 61 12 Teluguntla, P. *et al.* (ed NASA EOSDIS Land Processes DAAC) (2016).
- 62 13 Haddad, N. M. *et al.* Habitat fragmentation and its lasting impact on Earth's ecosystems.  
63 *Science Advances* **1**, e1500052, doi:10.1126/sciadv.1500052 (2015).
- 64 14 Laurance, W. F. *et al.* Ecosystem decay of Amazonian forest fragments: a 22-year  
65 investigation. *Conserv. Biol.* **16**, 605-618 (2002).
- 66 15 Zimmerman, B. L. & Kormos, C. F. Prospects for Sustainable Logging in Tropical  
67 Forests. *Bioscience* **62**, 479-487, doi:10.1525/bio.2012.62.5.9 (2012).
- 68 16 Cochrane, M. A. & Laurance, W. F. Fire as a large-scale edge effect in Amazonian  
69 forests. *Journal of Tropical Ecology* **18**, 311-325, doi:10.1017/S0266467402002237  
70 (2002).
- 71 17 Peres, C. A., Emilio, T., Schiatti, J., Desmoulière, S. J. M. & Levi, T. Dispersal limitation  
72 induces long-term biomass collapse in overhunted Amazonian forests. *Proceedings of the*  
73 *National Academy of Sciences* **113**, 892-897, doi:10.1073/pnas.1516525113 (2016).
- 74 18 Chaplin-Kramer, R. *et al.* Degradation in carbon stocks near tropical forest edges. *Nature*  
75 *Communications* **6**, 10158, doi:10.1038/ncomms10158  
76 <https://www.nature.com/articles/ncomms10158#supplementary-information> (2015).
- 77 19 Tulloch, A. I., Gordon, A., Runge, C. A. & Rhodes, J. R. Integrating spatially realistic  
78 infrastructure impacts into conservation planning to inform strategic environmental  
79 assessment. *Conservation Letters* **12**, e12648 (2019).
- 80 20 Benítez-López, A., Alkemade, R. & Verweij, P. A. The impacts of roads and other  
81 infrastructure on mammal and bird populations: a meta-analysis. *Biol. Conserv.* **143**,  
82 1307-1316 (2010).



- 33 21 Shapiro, A. C., Aguilar-Amuchastegui, N., Hostert, P. & Bastin, J.-F. Using fragmentation  
34 to assess degradation of forest edges in Democratic Republic of Congo. *Carbon Balance*  
35 *and Management* **11**, 11, doi:10.1186/s13021-016-0054-9 (2016).
- 36 22 Broadbent, E. N. *et al.* Forest fragmentation and edge effects from deforestation and  
37 selective logging in the Brazilian Amazon. *Biol. Conserv.* **141**, 1745-1757 (2008).
- 38 23 Maisels, F. *et al.* Devastating Decline of Forest Elephants in Central Africa. *PLOS ONE* **8**,  
39 e59469, doi:10.1371/journal.pone.0059469 (2013).
- 40 24 Benítez-López, A., Santini, L., Schipper, A. M., Busana, M. & Huijbregts, M. A. J. Intact  
41 but empty forests? Patterns of hunting-induced mammal defaunation in the tropics. *PLOS*  
42 *Biology* **17**, e3000247, doi:10.1371/journal.pbio.3000247 (2019).
- 43 25 Barrington-Leigh, C. & Millard-Ball, A. The world's user-generated road map is more  
44 than 80% complete. *PLOS ONE* **12**, e0180698, doi:10.1371/journal.pone.0180698 (2017).
- 45 26 Hughes, A. C. Have Indo-Malaysian forests reached the end of the road? *Biol. Conserv.*  
46 **223**, 129-137, doi:<https://doi.org/10.1016/j.biocon.2018.04.029> (2018).
- 47 27 Lamarche, C. *et al.* Compilation and validation of SAR and optical data products for a  
48 complete and global map of inland/ocean water tailored to the climate modeling  
49 community. *Remote Sensing* **9**, 36 (2017).
- 50 28 Gumma, M. *et al.* NASA Making Earth System Data Records for Use in Research  
51 Environments (MEaSUREs) Global Food Security-support Analysis Data (GFSAD)  
52 Cropland Extent 2015 South Asia, Afghanistan, Iran 30 m V001. (2017).
- 53 29 Massey, R. *et al.* (ed NASA EOSDIS Land Processes DAAC) (2017).
- 54 30 Oliphant, A. *et al.* NASA Making Earth System Data Records for Use in Research  
55 Environments (MEaSUREs) Global Food Security-support Analysis Data (GFSAD)  
56 Cropland Extent 2015 Southeast Asia 30 m V001. (2017).
- 57 31 Phalke, A. *et al.* (ed NASA EOSDIS Land Processes DAAC) (2017).
- 58 32 Teluguntla, P. *et al.* NASA Making Earth System Data Records for Use in Research  
59 Environments (MEaSUREs) Global Food Security-support Analysis Data (GFSAD)  
60 Cropland Extent 2015 Australia, New Zealand, China, Mongolia 30 m V001. (2017).
- 61 33 Xiong, J. *et al.* NASA Making Earth System Data Records for Use in Research  
62 Environments (MEaSUREs) Global Food Security-support Analysis Data (GFSAD)  
63 Cropland Extent 2015 Africa 30 m V001. (2017).
- 64 34 Zhong, Y. *et al.* (ed NASA EOSDIS Land Processes DAAC) (2017).
- 65 35 Pekel, J.-F., Cottam, A., Gorelick, N. & Belward, A. S. High-resolution mapping of global  
66 surface water and its long-term changes. *Nature* **540**, 418-422 (2016).
- 67  
68
